# Sag currents are a major contributor to human pyramidal cell intrinsic differences across cortical layers

Homeira Moradi Chameh<sup>1</sup>, Scott Rich<sup>1</sup>, Lihua Wang<sup>9</sup>, Fu-Der Chen<sup>8</sup>, Liang Zhang<sup>2,9</sup>, Peter L. Carlen<sup>2,9</sup>, Shreejoy J. Tripathy<sup>3,4,5\*</sup>, Taufik A. Valiante<sup>1,5,6,7,8\*</sup>

<sup>1</sup> Krembil Research Institute, Division of Clinical and Computational Neuroscience

<sup>2</sup> Department of Physiology, University of Toronto

<sup>3</sup> Krembil Centre for Neuroinformatics, Centre for Addiction and Mental Health

<sup>4</sup> Department of Psychiatry, University of Toronto.

<sup>5</sup> Institute of Medical Sciences, University of Toronto.

<sup>6</sup> Department of Surgery, Division of Neurosurgery, University of Toronto

<sup>7</sup> Institute of Biomaterials and Biomedical Engineering, University of Toronto

<sup>8</sup> Electrical and Computer Engineering, University of Toronto

<sup>9</sup> Krembil Research Institute, Division of Experimental and Translational Neuroscience

\*Denotes equal contribution

## Abstract

In the human neocortex, coherent theta (~8Hz) oscillations between superficial and deep cortical layers are driven by deep layer neurons, suggesting distinct intrinsic electrophysiological properties of L5 neurons. We used in vitro whole-cell recordings to characterize pyramidal cells in layer 2/3 (L2/3), layer 3c (L3c) and layer 5 (L5) of the human neocortex. L5 pyramidal cells were more excitable and had a more prominent sag relative to L2/3 and L3c neurons that was abolished by blockade of the hyperpolarization activated cation current ( $I_h$ ). We found a greater proportion of L5 and L3c neurons displaying subthreshold resonance relative to L2/3. Although no theta subthreshold resonance was observed in either L5 and L2/3 neurons, L5 neurons were more adept at tracking both delta (4Hz) and theta oscillations, the former being dependent on  $I_h$ . The unique features of human L5 neurons likely contribute to the emergence of theta oscillations in human cortical microcircuits.

## 1. Introduction

Comparative studies between human and rodent cortical neuronal physiology have revealed unique human cortical neuronal and microcircuit properties. At the cellular level, human neurons have been shown to have unique morphological properties <sup>1</sup>, reduced membrane capacitances <sup>2</sup>, increased dendritic compartmentalization in thick-tufted layer 5 (L5) pyramidal cells <sup>3</sup>, higher h-channel densities in layer 3 (L3) versus layer 2 (L2) pyramidal cells <sup>4</sup>, and a wholly unique interneuron cell type <sup>5,6</sup>. At the microcircuit level, human neocortical circuits demonstrate unique reverberant activity <sup>7</sup>, different short-term plasticity rules, compared to neocortical circuits in rodents <sup>8,9</sup>, and coherent oscillations between superficial and deep cortical layers <sup>10</sup>. In addition, correlations between patient IQ and cellular features of human layer 2, 3 and 4 pyramidal cells have been demonstrated in both action potential kinetics and the length and complexity of dendritic arbors <sup>11</sup>.

Although understanding the unique biophysical and synaptic properties of neurons remains an important endeavor, computational models and mathematical formulations of neurons and circuits are essential for describing and explaining mesoscopic level collective dynamics such as oscillations <sup>12-14</sup>. Indeed, it has been recently posited that “a set of *brain simulators* based on *neuron models* at different

45 levels of biological detail” are needed in order to “allow for systematic refinement of candidate network  
46 models by comparison with *experiments*”<sup>15</sup>. By extension, to create simulations of the human brain and  
47 cortical microcircuit, we need neuronal models derived from direct human experiments. Thus, as we  
48 explore what is uniquely human about the human brain in order to, for example, tackle the increasing  
49 societal burden of neurological and neuropsychiatric conditions<sup>16,17</sup>, infusing computational models with  
50 human derived micro- and mesoscopic cellular and circuit properties will be critically important.

51 In this context, our previous experiments in human cortical slices have demonstrated that  
52 spontaneous theta-like activity, the most ubiquitous oscillatory frequency in the human brain<sup>18</sup>, can be  
53 induced by application of cholinergic and glutamatergic agonists<sup>10</sup>. We observed theta oscillations that  
54 were coherent between cortical laminae, with the deep layer leading in phase relative to the superficial  
55 layer<sup>10</sup>. We also observed robust cross-frequency coupling between theta and high-gamma activity that  
56 was modulated with the strength of synchrony between cortical laminae<sup>19</sup>– “so called coordination though  
57 coherent phase–amplitude coupling”<sup>20</sup>. Given the role of intrinsic electrophysiological properties in the  
58 generation of oscillations<sup>21</sup> and our previous findings that deep layer theta leads superficial layer theta in  
59 phase, we reasoned that deep layer neurons in the human neocortex are likely endowed with distinct  
60 biophysical properties that enable them to “drive” such interlaminar activity.

61 One of the candidate membrane currents thought to contribute to low-frequency (< 8Hz)  
62 oscillations is the hyperpolarization activated cation current or h-current ( $I_h$ )<sup>3,4,22,23</sup>. This current is  
63 important for oscillations and pacemaking activity in a myriad of cell types, ranging from thalamic and  
64 hippocampal neurons to cardiac pacemaker neurons<sup>24,25</sup>. Consistent with its role in contributing to  
65 resonant activity, in a recent study in the human neocortex Kalmbach, B et. al (2018) demonstrated a  
66 prominent sag voltage in deep L3 versus superficial L2 neurons, and further, that  $I_h$  appeared necessary for  
67 the resonance observed in the L3 neurons<sup>4</sup>. In addition, it has recently been reported that thick-tufted  
68 neurons in L5 of the human neocortex also display prominent somatic and dendritic  $I_h$  and subthreshold  
69 resonance<sup>3</sup>.

70 Based on our previous findings demonstrating that deep layer activity appears to drive superficial  
71 activity, we hypothesized that intrinsic pyramidal cell properties would differ between deep versus  
72 superficial layers. We used whole-cell recordings to characterize pyramidal cells in L2/3, L3c, and L5,  
73 focusing in particular on the amplitude and kinetics of  $I_h$  or sag voltage. In addition to key biophysical  
74 differences favoring greater excitability in human L5 vs. L2/3 pyramidal cells, we found that L5 and L3c  
75 demonstrated larger sag voltage amplitudes relative to L2/3 pyramidal cells. Somewhat surprisingly, while  
76 some subthreshold theta resonance was observed in our experiments, we found this feature to be generally  
77 quite rare amongst pyramidal cells across all layers. However, we observed that L5 pyramidal cells showed  
78 enhanced frequency dependent gain at delta and theta frequencies. Lastly, we found a great deal of cell-  
79 to-cell variability in electrophysiological parameters sampled from pyramidal cells recorded within the  
80 same lamina, and that this variability is especially large in L5.

## 81 2. Materials and Methods

### 82 2.1. Human brain slice preparation

83 Written informed consent was obtained from all study participants as stated in the research  
84 protocol. In accordance with the Declaration of Helsinki, approval for this study was received by the  
85 University Health Network Research Ethics board. Sixty-one patients, age ranging between 19 to 63 years  
86 (Mean age:  $37.1 \pm 1.8$ ), underwent a standard anterior temporal lobectomy (ATL)<sup>26</sup> or tumor resection  
87 from the frontal or temporal lobe<sup>27,28</sup> under general anesthesia using volatile anesthetics.

88 The surgery involved resecting the first 4.5 cm of neocortex using sharp dissection and local cooling  
89 with ~4 °C TissueSol®. Immediately following surgical resection, the cortical block was submerged in an  
90 ice-cold (~4°C) cutting solution that was continuously bubbled with 95% O<sub>2</sub>-5% CO<sub>2</sub> containing (in mM)  
91 sucrose 248, KCl 2, MgSO<sub>4</sub>·7H<sub>2</sub>O 3, CaCl<sub>2</sub>·2H<sub>2</sub>O 1, NaHCO<sub>3</sub> 26, NaH<sub>2</sub>PO<sub>4</sub>·H<sub>2</sub>O 1.25, D-glucose 10. The  
92 osmolarity was adjusted to 300-305 mOsm. The total duration, including slicing and transportation, was  
93 kept to a maximum of 20 minutes<sup>28</sup>. Transverse brain slices (400 μm) were obtained using a vibratome  
94 (Leica 1200 V) in cutting solution. Tissue slicing was performed perpendicular to the pial surface to ensure  
95 that pyramidal cell dendrites were minimally truncated<sup>4,27</sup>. The cutting solution was the same as used for  
96 transport of tissue from operation room to the laboratory. After sectioning, the slices were incubated for  
97 30 min at 34 °C in standard artificial cerebrospinal fluid (aCSF) (in mM): NaCl 123, KCl 4, CaCl<sub>2</sub>·2H<sub>2</sub>O 1,  
98 MgSO<sub>4</sub>·7H<sub>2</sub>O 1, NaHCO<sub>3</sub> 26, NaH<sub>2</sub>PO<sub>4</sub>·H<sub>2</sub>O 1.2, and D-glucose 10, pH 7.40. All aCSF and cutting solutions  
99 were continuously bubbled with carbogen gas (95% O<sub>2</sub>-5% CO<sub>2</sub>) and had an osmolarity of 300-305 mOsm.  
100 Following this incubation, the slices were maintained in standard aCSF at 22–23 °C for at least 1 h, until  
101 they were individually transferred to a submerged recording chamber.

102 For a subset of experiments designed to assess frequency dependent gain, slices were prepared using the  
103 NMDG protective recovery method<sup>29</sup>. The slicing and transport solution was composed of (in mM): NMDG  
104 92, KCl 2.5, NaH<sub>2</sub>PO<sub>4</sub> 1.25, NaHCO<sub>3</sub> 30, HEPES 20, Glucose 25, Thiourea 2, Na L-ascorbate 5, Na-Pyruvate 3,  
105 CaCl<sub>2</sub>·4H<sub>2</sub>O 0.5, and MgSO<sub>4</sub>·7H<sub>2</sub>O 10. The pH of NMDG solution was adjusted to 7.3-7.4 using hydrochloric  
106 acid and the osmolarity was 300-305 mOsm. Before transport and slicing, the NMDG solution was  
107 carbogenated for 15 min and chilled to 2-4 °C. After slices were cut (as described above), they were  
108 transferred to a recovery chamber filled with 32-34 °C NMDG solution, and continuously bubbled with 95%  
109 O<sub>2</sub> 5% CO<sub>2</sub>. After 12 minutes, the slices were transferred to an incubation solution containing (in mM): NaCl  
110 92, KCl 2.5, NaH<sub>2</sub>PO<sub>4</sub>·H<sub>2</sub>O 1.25, NaHCO<sub>3</sub> 30, HEPES 20, Glucose 25, Thiourea 2, Na L-ascorbate 5, Na-  
111 Pyruvate 3, CaCl<sub>2</sub>·4H<sub>2</sub>O 2, and MgSO<sub>4</sub>·7H<sub>2</sub>O 2. The solution was continuously bubbled with 95% O<sub>2</sub> -5% CO<sub>2</sub>.  
112 After a 1 hour incubation at room temperature, slices were transferred to a recording chamber and  
113 continuously perfused with aCSF containing (in mM): NaCl 126, KCl 2.5, NaH<sub>2</sub>PO<sub>4</sub>·H<sub>2</sub>O 1.25, NaHCO<sub>3</sub> 26,  
114 Glucose 12.6, CaCl<sub>2</sub>·2H<sub>2</sub>O 2, and MgSO<sub>4</sub>·7H<sub>2</sub>O 1. We emphasize that these experiments were performed  
115 with excitatory (APV 50 μM, Sigma; CNQX 25 μM, Sigma) and inhibitory (Bicuculline 10 μM, Sigma; CGP-  
116 35348 10 μM, Sigma) synaptic activity blocked. These blockers are only used in these experiments,  
117 highlighted in Figure 5.

## 118 *2.2. Electrophysiology recordings and intrinsic physiology feature analysis*

119 For recordings, slices were transferred to a recording chamber mounted on a fixed-stage upright  
120 microscope (Olympus BX<sub>51</sub>WI upright microscope; Olympus Optical Co., NY, USA and Axioskop 2 FS MOT;  
121 Carl Zeiss, Germany). Slices were continually perfused at 4 ml/min with standard aCSF at 32-34 °C. Cortical  
122 neurons were visualized using an IR-CCD camera (IR-1000, MTI, USA) with a 40x water immersion objective  
123 lens. Using the IR-DIC microscope, the boundary between layer 1 and 2 was easily distinguishable in terms  
124 of cell density. Below L2, the sparser area of neurons (L3) were followed by a tight band of densely packed  
125 layer 4 (L4) neurons. L4 was followed by a decrease in cell density (L5). In general, we did not annotate  
126 different neurons recorded from L2 versus those recorded from L3, except when explicitly mentioned.

127 Patch pipettes (3-6 MΩ resistance) were pulled from standard borosilicate glass pipettes (thin-wall  
128 borosilicate tubes with filaments, World Precision Instruments, Sarasota, FL, USA) using a vertical puller  
129 (PC-10, Narishige). Pipettes were filled with intracellular solution containing (in mM): K-gluconate 135; NaCl  
130 10; HEPES 10; MgCl<sub>2</sub> 1; Na<sub>2</sub>ATP 2; GTP 0.3, pH adjusted with KOH to 7.4 (290–309 mOsm). In a subset of  
131 experiments the pipette solution also contained biocytin (3-5%). Whole-cell patch-clamp recordings were  
132 obtained using a Multiclamp 700A amplifier, Axopatch 200B amplifier, pClamp 9.2 and pClamp 10.6 data

133 acquisition software (Axon instruments, Molecular Devices, USA). Subsequently, electrical signals were  
134 digitized at 20 kHz using a 1320X digitizer. The access resistance was monitored throughout the recording  
135 (typically between 8-25 M $\Omega$ ), and neurons were discarded if the access resistance was > 25 M $\Omega$ . The liquid  
136 junction potential was calculated to be -10.8 mV and was not corrected.

137 Data were analysed off-line using Clampfit 10.7, Python, MATLAB, and R software. The resting  
138 membrane potential (RMP) was measured after breaking into the cell (IC=0). The majority of the intrinsic  
139 electrophysiological features reported here were calculated using the Python IPFX toolbox  
140 (<https://github.com/AllenInstitute/ipfx/>) with default parameter settings<sup>30</sup>. The input resistance and  
141 membrane time constant were calculated using hyperpolarizing sweeps between -50 to -200pA. Single  
142 action potential features, the like action potential threshold, peak, width at half-max, and the upstroke-  
143 downstroke ratio, were calculated using the first spike at rheobase. The adaptation index, average firing  
144 rate, inter-spike intervals (first, mean, median, coefficient of variation) were defined using the “hero”  
145 sweep with default parameters (defined as the sweep between 39 to 61 pA greater than the rheobase).  
146 Sag amplitude and sag ratio were defined in response to hyperpolarizing current pulses (600ms duration,  
147 0 to -400 pA, 50 pA steps). The sag ratio was calculated as the difference between the minimum value and  
148 the steady state divided by peak deflection during hyperpolarization current injection. The rebound  
149 depolarization amplitude was calculated as the difference between the steady state voltage and the  
150 maximum depolarization potential. We also observed the presence or absence of rebound spiking following  
151 the injection of hyperpolarization current steps (-400 pA). The  $I_h$  blocker ZD7288 (10  $\mu$ M, Sigma Aldrich)  
152 was applied to confirm pharmacological evidence for  $I_h$ .

153 Bursting neurons were defined as those where the instantaneous frequency (determined by the  
154 first inter-spike interval at rheobase) was greater than 75 Hz. We identified putative interneurons within  
155 our dataset by manually assessing each cell’s maximum firing rates, spike widths, and after-  
156 hyperpolarization amplitudes. Interneurons typically had spike half-widths less than <1 ms,  
157 afterhyperpolarization amplitudes greater than 10 mV, and maximum firing rates > 75Hz<sup>31</sup>.

### 158 *2.3. Voltage-clamp characterisation of $I_h$ and $I_{tail}$*

159 To characterize the  $I_h$ , 600 ms-long voltage-clamp steps were used in -10mV increments, down to  
160 -140mV from a holding potential of -60mV. In order to measure  $I_h$  amplitude, the difference between the  
161 steady state at the end of the holding potential and the maximum current was determined. The  $I_{tail}$  was  
162 quantified as the difference between peak amplitude of residual current at the end of each holding  
163 potential and the steady state current from holding potentials of -140 to -60 mV. A single or double-  
164 exponential model, fitted to the various currents recorded, was used to calculate the time constants of  $I_h$   
165 in order to determine the kinetics of  $I_h$ . To measure the voltage sensitivity of  $I_h$  in L2/3 and L5 pyramidal  
166 cells, the membrane potential evoking half-maximal activation of  $I_h$  ( $V_{50}$ ) was obtained by fitting the  $I_h$   
167 activation to a Boltzmann sigmoid function using GraphPad 6 (GraphPad, San Diego, CA, USA). In  
168 experiments to quantify  $I_h$ , the sodium channel blocker tetrodotoxin (1  $\mu$ M; Alomone Labs) to block voltage  
169 gated sodium currents,  $CoCl_2$  (2mM; Sigma-Aldrich) to block voltage-sensitive calcium currents, and  $BaCl_2$   
170 (1mM; Sigma-Aldrich) to block inwardly rectifying potassium current were added to the bath solution. We  
171 note that space clamp issues limit the precise quantification of the  $I_h$ <sup>32</sup>.

### 172 *2.4. Subthreshold resonance and spike probability analyses*

173 To assess the subthreshold and suprathreshold resonance properties, a frequency modulated sine  
174 wave current input (ZAP/chirp) was generated ranging from 1 to 20Hz, lasting 20s<sup>33</sup> with a sampling rate  
175 of 10kHz. This current waveform was then injected using the custom waveform feature of Clampex 9.2 and

176 Clampex 10.2 (Axon Instruments, Molecular devices, USA). The subthreshold current amplitude was  
177 adjusted to the maximal current that did not elicit spiking.

178 For determining subthreshold resonance, only trials without spiking were utilized for analysis.  
179 Analyses were performed using in house Python scripts adapted from <sup>4</sup>. The impedance profile of the cell  
180 was computed by taking the ratio of the voltage over current in the frequency domain obtained with the  
181 fast Fourier transform. Window averaging was then applied to smooth the impedance profile of the cell.  
182 The impedance profiles were then averaged over several trials (up to 5) to obtain the mean impedance  
183 profile of the cell. The frequency point with the highest impedance is the center frequency while the  
184 frequency point with half of the center impedance is the 3dB cut-off frequency. Resonant neurons were  
185 defined as those with resonant frequencies greater than 0.5 Hz, the lowest frequency tested here.

186 To analyze responses to suprathreshold frequency-modulated sinusoidal current, spiking  
187 probability as a function of input frequency was assessed using suprathreshold current stimulation. The  
188 suprathreshold current was set by gradually increasing the amplitude of the ZAP function input by adjusting  
189 the gain of the stimulus until the first spike was elicited. Ten traces per cell were utilized to obtain the  
190 probability of spiking as a function of frequency. Since the instantaneous frequency is known from the  
191 current input, each action potential could be assigned a frequency at which it occurred. To create the spike  
192 probability density function for each cell type, the frequencies at which individual spikes occurred were  
193 pooled, a histogram generated and divided by the total number of spikes. To compare spike probability  
194 density functions between cell types the distributions were compared using a two-sample Kolmogorov-  
195 Smirnov test (`kstest2 .m`).

## 196 *2.5. Multi-variate electrophysiological feature analysis*

197 We used a dimensionality reduction approach to visualize similarities in recorded neurons  
198 according to multi-variate correlations in measured electrophysiology features. We specifically used the  
199 uniform manifold approximation (UMAP) function and library implemented in R with default parameter  
200 settings <sup>34</sup>. We defined each recorded cell using feature vectors constructed from a set of 14  
201 electrophysiological features that were reliably calculated in most characterized neurons. We specifically  
202 used the following subthreshold features: resting membrane potential, input resistance, membrane time  
203 constant, sag ratio, sag amplitude. We additionally used the following suprathreshold features of the first  
204 action potential at rheobase: AP threshold, amplitude, half-width, upstroke-downstroke ratio, after-  
205 hyperpolarization amplitude, rheobase, and latency to first spike. We also used the following spike train  
206 features: slope of FI curve and average spiking rate at the hero sweep stimulus.

## 207 *2.6. Frequency Dependent Gain*

208 Following a similar methodology of <sup>35</sup>, frequency dependent gain was computed using 30 trials  
209 (inter-trial interval = 20s) of a 2.5s duration current injection stimulus of frozen white noise convolved with  
210 a 3ms square function <sup>36</sup>. The amplitude (a.k.a. variance) of the current injection stimulus was scaled to  
211 elicit spike rates of above 5 Hz, the typical firing rate for cortical pyramidal cells <sup>37</sup>. In addition to increasing  
212 the noise variance, a steady amount of DC current was required <sup>35</sup> to elicit spiking, which was delivered as  
213 various amplitude steps were added to the noisy current input. Peaks detected in the voltage time series  
214 with overshoot greater than 0 mV were taken to be the occurrence of an action potential. The time varying  
215 firing rate  $r(t)$  was given by:

$$216 \quad r(t) = \begin{cases} 1 & \text{where spike detected} \\ \Delta t & \\ 0 & \text{Where no spike detected} \end{cases}$$

217 The stimulus–response correlation ( $c_{sr}$ ) and the stimulus autocorrelation ( $c_{ss}$ ) were calculated in the  
218 following fashion:

$$219 \quad c_{sr}(\tau) = \langle s(t)r(t + \tau) \rangle$$

$$220 \quad c_{ss}(\tau) = \langle s(t)s(t + \tau) \rangle$$

221 where  $\tau$  is the time difference, and the stimulus  $s(t)$  is  $I_{noise}(t)$ . After windowing the  $c_{sr}(\tau)$  and  $c_{ss}(\tau)$   
222 functions (see below), the complex Fourier components  $C_{sr}(f)$  and  $C_{ss}(f)$  were obtained, and the frequency-  
223 dependent gain and the average phase shift were calculated with  $\sigma = 1/f$ , in order to ensure the spectral  
224 estimates were not dominated by noise. The gain ( $G(f)$ ) and the phase ( $\varphi(f)$ ) are:

$$225 \quad G(f) = \frac{|C_{sr}(f)|}{|C_{ss}(f)|}$$

$$226 \quad \varphi(f) = \text{atan} \frac{[Im[C_{sr}(f)]]}{[Re[C_{sr}(f)]]}$$

227 where  $Re$  and  $Im$  refer to the real and imaginary parts of each Fourier component.  $\varphi(f)$  was then  
228 corrected using the peak time ( $\tau_{delay}$ ) of  $c_{sr}(\tau)$ <sup>35</sup>.

229 For statistical testing, individual gains or  $G(f)$ s for each cell (30 trials/cell) from neurons with spike  
230 rates above 5 Hz were pooled for each cell type. To compare between cell types, Mann-Whitney U  
231 (ranksum.m) was used to obtain a  $p$ -value at each frequency (2-100Hz in 0.2Hz steps). The  $p$ -values were  
232 the false discovery rate corrected with an alpha = 0.01<sup>38</sup>.

## 233 *2.7. Histological methods*

234 During electrophysiological recording, biocytin (3-5 mg/ml) was allowed to diffuse into the patched  
235 neuron; after 20-45 min, the electrodes were slowly retracted under visual guidance to maintain the quality  
236 of the seal and staining. The slices were left for another 10-15 min in the recording chamber to washout  
237 excess biocytin from extracellular space, then transferred to 4% paraformaldehyde and kept at 4°C for 24  
238 hours.

239 Subsequently, the slices were washed and transferred into PBS solution (0.1 mM). To reveal  
240 biocytin, slices were incubated in blocking serum (0.5 % Bovine serum albumin (BSA), 0.5 % milk powder)  
241 and 0.1% Triton X-100 in PBS for 1 hour at room temperature. Finally, slices were incubated with  
242 streptavidin-conjugated Alexa Fluor 568 (1:300) overnight at 4°C. Then slices were rinsed with PBS and  
243 mounted on the slide using moviol (Sigma-Aldrich). Imaging was done using a Zeiss LSM710 Multiphoton  
244 microscope. Reconstructions were performed using IMARIS software (Bitplane, Oxford instrument  
245 company).

## 246 *2.8. Statistical analyses*

247 Statistical analyses and plotting were performed using GraphPad Prism 6. Data are presented in  
248 the text as mean  $\pm$  SD unless otherwise noted. Unless stated otherwise, a standard threshold of  $p < 0.05$  was  
249 used to report statistically significant differences. The Kruskal-Wallis test, a non-parametric test, was used  
250 to test for statistical differences among groups. Dunn's test was used to correct multiple comparisons. The  
251 non-parametric Mann-Whitney test was used to determine statistical differences between two groups.

252 To evaluate the presence of correlations between electrophysiological variables and patient  
253 demographic variables, we used a mixed effects modeling approach, implemented in R using lme4<sup>39</sup>.

254 Specifically, we modeled age as a fixed effect and patient ID as a random effect, i.e.,  $\text{ephys\_prop} \sim \text{age} +$   
255  $(1|\text{subject\_id})$ . To evaluate the statistical significance of the demographic term, we fit a second model with  
256 the random effect only and used an ANOVA to evaluate the difference between the two models. To  
257 calculate correlation coefficients from mixed effects models for fixed effects terms (like age), we used the  
258 MuMIn R package to calculate the R squared values associated with our fixed effects (i.e., the marginal  
259 effect) and calculated the square root of this to obtain a correlation coefficient<sup>40</sup>.

## 260 *2.9. Data and code availability*

261 Processed datasets will be made available upon reasonable request. Computational code for custom  
262 analyses are available at the following GitHub repositories: [https://github.com/stripathy/valiante\\_ih](https://github.com/stripathy/valiante_ih) (R)  
263 and [https://github.com/stripathy/valiante\\_lab\\_abf\\_process](https://github.com/stripathy/valiante_lab_abf_process) (Python).

264

265 Table 1: Demographic data (for a subset of 49 patients where such information was available)

| Age (Years) | Sex | Years of seizure history | Diagnosis | Antiepileptic drugs     | Resection location |
|-------------|-----|--------------------------|-----------|-------------------------|--------------------|
| 39          | F   | 11                       | Tumor     | LSC, LRZ, LEV           | Right-ATL          |
| 58          | F   | 8                        | Tumor     | CBZ                     | Left-FL            |
| 57          | M   | 45                       | Epilepsy  | LSC, CZP, CBZ           | Right-ATL          |
| 27          | M   | 11                       | Epilepsy  | LSC, LRZ, CLB           | Right-ATL          |
| 24          | M   | 8                        | Epilepsy  | LEV, LTG                | Right-ATL          |
| 25          | M   | 12                       | Epilepsy  | CBZ, LSC                | Right-ATL          |
| 33          | F   | 4                        | Epilepsy  | LEV                     | Left-FL            |
| 33          | M   | 14                       | Epilepsy  | PHN, LEV                | Right-FL           |
| 22          | M   | 6                        | Epilepsy  | PHN, CBZ, LTG           | Left-ATL           |
| 21          | M   | 2                        | Epilepsy  | DR, CLB, MJ             | Parietal lobe      |
| 22          | M   | 12                       | Epilepsy  | PHN, LRZ                | Right-ATL          |
| 23          | F   | 23                       | Epilepsy  | CBZ, LEV, LSC           | Right-FL           |
| 53          | F   | 43                       | Epilepsy  | CBZ, LSC, LEV           | Left-ATL           |
| 37          | F   | 2                        | Tumor     | GPN, LSC, LEV, CLB, LRZ | Right-FL           |
| 47          | F   | 4                        | Epilepsy  | CBZ, CLB                | Left-ATL           |
| 52          | M   | 13                       | Epilepsy  | CBZ, CLB                | Left-ATL           |
| 50          | F   | 26                       | Epilepsy  | PHN, LTG                | Right-ATL          |
| 36          | F   | 34                       | Epilepsy  | LSC, CBZ                | Left-ATL           |
| 40          | M   | 29                       | Epilepsy  | LEV                     | Right-ATL          |
| 25          | F   | 10                       | Epilepsy  | CBZ, LSC, LEV           | Right-ATL          |
| 52          | M   | 27                       | Epilepsy  | LSC, LRZ                | Left-ATL           |
| 21          | M   | 11                       | Epilepsy  | LTG, CBZ                | Left-ATL           |
| 63          | M   | 0.1                      | Tumor     | PHN                     | Right-Parietal     |
| 42          | M   | 22                       | Epilepsy  | CBZ                     | Right-FL           |
| 25          | F   | 22                       | Epilepsy  | LSC, CLB, LTG           | Right-FL           |
| 24          | F   | 3                        | Tumor     | LEV                     | Left-ATL           |
| 53          | M   | 9                        | Epilepsy  | LEV                     | Left-ATL           |
| 45          | F   | 20                       | Epilepsy  | LTG                     | Right-ATL          |
| 26          | F   | 25                       | Epilepsy  | CBZ, CLB, LTG           | Right-ATL          |
| 35          | F   | 14                       | Epilepsy  | LRZ, DR, PHN            | Left-ATL           |
| 24          | M   | 6                        | Epilepsy  | LSC, LRZ, MJ            | Right-ATL          |
| 53          | F   | 51                       | Epilepsy  | LSC, CLB                | Left-ATL           |
| 44          | F   | 3                        | Epilepsy  | LTG                     | Left-ATL           |
| 25          | M   | 14                       | Epilepsy  | CBZ                     | Right-ATL          |
| 19          | F   | 15                       | Epilepsy  | PB, CLB, GPN, RFM       | Right-ATL          |
| 30          | M   | 12                       | Epilepsy  | PHN                     | Left-ATL           |
| 26          | M   | 5                        | Epilepsy  | CBZ, DR                 | Right-ATL          |
| 28          | M   | 13                       | Epilepsy  | CLB, MJ                 | Left-ATL           |
| 52          | F   | 6                        | Epilepsy  | LTG, LEF                | Left-ATL           |
| 26          | F   | 9                        | Epilepsy  | ESL, TMP, CLB           | Right-ATL          |
| 59          | F   | 39                       | Epilepsy  | CLB, LSC                | Right-ATL          |
| 37          | M   | 5                        | Epilepsy  | CLB, LSC                | Right-ATL          |
| 55          | M   | 27                       | Epilepsy  | CLB, ESL, LTG           | Left-ATL           |
| 42          | F   | 3                        | Epilepsy  | CBZ, GPN                | Right-ATL          |
| 57          | F   | 56                       | Epilepsy  | CLB, LTG, PRM, CBD oil  | Left-ATL           |
| 24          | M   | 4                        | Epilepsy  | LEV, LTG                | Left ATL           |
| 33          | M   | 6                        | Epilepsy  | LSC, PGB, PHN           | Right-ATL          |
| 39          | M   | 12                       | Epilepsy  | CLB, LTG, MJ            | Left-ATL           |
| 36          | F   | 16                       | Epilepsy  | LSC, PGB, PHN           | Right-ATL          |

266

267 CBZ, Carbamazepine; CLB, Clobazam; CZP, Clonazepam; DR, Divalproex; GPN, Gabapentin; LEV, Levetiracetam; LRZ, Lorazepam;  
 268 LSC, Lacosamide; LTG, Lamotrigine; MJ, Marijuana; PB, Phenobarbital; PHN, Phenytoin; RFM, Rufinamide; LEF, Leflunomide; ESL,  
 269 Eslicarbazepine Acetate; TMP, Tetramethylpyrazine; PRM, primidone; CBD, cannabidiol; PGB, Pregabalin.

270



## 271 3. Results

272 Whole-cell patch clamp recordings were obtained from human neocortical neurons located in L2/3,  
273 L3c and L5 within acute brain slices collected from 61 patients. Tissues were obtained from patients who  
274 underwent resective surgery for pharmacologically intractable epilepsy or tumor removal (a summary table  
275 with patient details shown in Supplemental Table 1). For many of our recordings, we did not annotate our  
276 L2/3 pyramidal cells as specifically belonging to either L2 or L3, considering the majority of these data were  
277 collected prior to publication of a recent paper illustrating divergent electrophysiological and  
278 morphological features of these neurons in the human neocortex<sup>4</sup>. Consequently, we later recorded from  
279 a targeted set of pyramidal cells in L3c (i.e., the deepest part of L3) to specifically contrast and compare our  
280 findings with those from previous finding<sup>4</sup>.

### 281 *3.1. Diverse morphologies and passive membrane properties of pyramidal cells in L2/3, L3c and L5*

282

283 In order to confirm the successful targeting of pyramidal cells, a subset of neurons was filled with  
284 biocytin and underwent subsequent morphological reconstruction. Figure 1A shows example  
285 electrophysiological recordings of L2/3, L3c and L5 pyramidal cells with corresponding 3D morphological  
286 reconstructions.

287 The 3D reconstructions revealed a rich diversity of human pyramidal cell morphologies, consistent  
288 with recent detailed demonstrations of the distinct cellular morphologies of human cortical neurons as a  
289 function of the cortical lamina<sup>1,3,4,41</sup>. Pyramidal cells with somas located in L2 and the upper part of L3 had  
290 complex basal dendrites, with apical dendrites often reaching L1. Pyramidal cells located in L3c showed  
291 different morphologies, with one cell (cell d) showing simple basal dendrites and another (cell e) showing  
292 much more complex basal dendrites, consistent with recent reports on the heterogeneity of pyramidal cells  
293 in L3<sup>41</sup>. Lastly, we observed two L5 neurons with very different morphologies: one cell (cell f) displays a  
294 simple, “thin-tufted” morphology with apical dendrites terminating at the border of L3 and L4, and another  
295 pyramidal cell (cell g) appears “thick-tufted” (similar to those reported in<sup>3</sup>), with a highly complex basal  
296 dendrite and two apical dendrite trunks, with one trunk terminating in upper L3 and the other projecting  
297 to lower L3 prior to being truncated due to slicing or optical truncation.

298 We next assessed the passive membrane properties (i.e. resting membrane potential, input  
299 resistance and membrane time constant) of human cortical pyramidal cells in L2/3, L3c and L5 (n=56, n=15  
300 and n=105 neurons, respectively), using hyperpolarizing current steps in current-clamp mode (see  
301 Methods). We found that passive membrane properties differed significantly between pyramidal cells of  
302 L2/3, L3c and L5. We found that L3c and L5 neurons had more depolarized resting membrane potentials  
303 relative to L2/3 neurons (L2/3:  $-68.2 \pm 5.3$  mV, L3c:  $-65.6 \pm 3.8$  mV, L5:  $-65.6 \pm 6.5$  mV; Figure 1B), with L5  
304 neurons being significantly more depolarized at rest compared to L2/3 neurons ( $p=0.007$ ). We also found  
305 that L5 pyramidal cells showed higher input resistances relative to L2/3 and L3c neurons (L2/3:  $83 \pm 38.1$   
306 M $\Omega$ , L3c:  $79.4 \pm 21.4$  M $\Omega$ , L5:  $94.2 \pm 41.3$  M $\Omega$ ; Figure 1C). However, this difference was not significant  
307 between layers ( $p=0.1$ ). L5 and L3c pyramidal cells also had slower membrane time constants ( $\tau_m$ )  
308 compared to L2/3 (L2/3:  $13.7 \pm 7.1$  ms, L3c:  $17.1 \pm 5.7$  ms, L5:  $19.3 \pm 9.1$  ms,  $p<0.0001$ ; Figure 1D).

309 In general, we found considerable electrophysiological heterogeneity among neurons sampled  
310 within each cortical layer, broadly consistent with the morphological reconstructions shown in Fig 1A. For  
311 example, we found that pyramidal cells in L5 had input resistances as low as 20 M $\Omega$  and as high as 200 M $\Omega$ ,  
312 likely reflecting the dichotomy or graded variation between thin- and thick-tufted pyramidal cells (as well  
313 as the potential of inadvertent cutting of dendrites during slice preparation, see Discussion). We note that  
314 the average input resistance among our population of recorded L5 pyramidal cells is considerably higher

315 than that reported in <sup>3</sup>, likely arising from differences in the neurons targeted for recordings between our  
 316 studies (see Discussion).

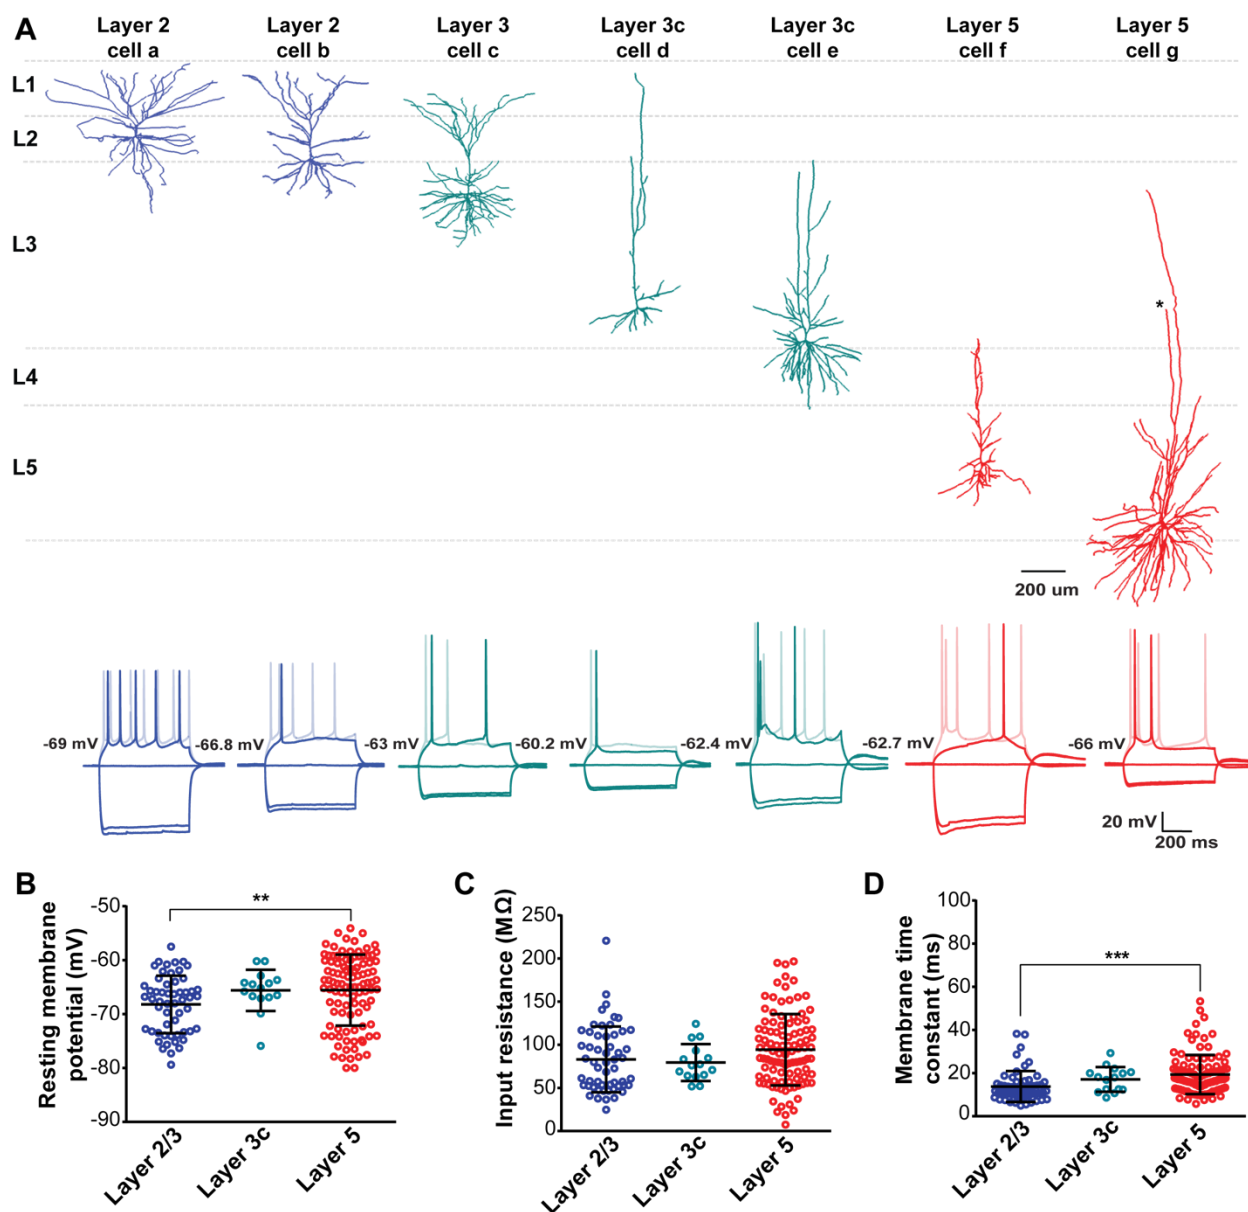

317  
 318 **Figure 1. Diverse morphologies and passive membrane properties among pyramidal cells in the**  
 319 **human neocortex. (A)** Example 3D reconstructions (top) and voltage traces (bottom) for example L2/3, L3c  
 320 and L5 pyramidal cells following hyperpolarizing and depolarizing current injection. Voltage traces have  
 321 been shaded for visual clarity. Cortical layer and relative position from pial surface are annotated for each  
 322 reconstructed cell. Asterisk in one branch of apical dendrite in cell g indicates truncation (dendrite  
 323 morphologies were otherwise not visibly truncated). Cell e was recorded in the presence of blockers of  
 324 synaptic activity (see Methods). **(B-D)** Resting membrane potentials (B), input resistances (C) and  
 325 membrane time constants (C) for pyramidal cells in L2/3, L3c, and L5. Error bars in B-D denote mean and  
 326 standard deviations (SD) and group comparisons and asterisks indicate significant group differences. \*\*  
 327 denotes  $p < 0.01$  and \*\*\* denotes  $p < 0.001$ , Wilcoxon non-parametric test.

328 *3.2. Subthreshold active membrane properties of pyramidal cells in L2/3, L3c and L5*

329

330 We next injected a series of hyperpolarizing currents to assay sag voltage and rebound  
331 depolarization (L2/3: n=56, L3c: n= 15, L5: n=105). L5 pyramidal cells had significantly larger sag voltage  
332 amplitudes than L2/3 pyramidal cells (L2/3:  $1.7 \pm 1.1$  mV, L3c:  $2.3 \pm 0.7$  mV, L5:  $3.2 \pm 1.9$  mV,  $p < 0.0001$   
333 between L2/3 and L5; Figures 2A, B). Our findings further support recent evidence for a positive correlation  
334 between sag voltage amplitude and distance from pial surface<sup>4</sup>. We found similar results using the  
335 dimensionless sag ratio measure, that normalizes for input resistance differences between neurons (Figure  
336 S1A). In addition, 21.9% of L5 pyramidal cells exhibited rebound spiking following the termination of a  
337 hyperpolarizing current pulse, whereas 1.8 % of L2/3 neurons exhibited rebound spiking and rebound  
338 spiking was not observed in any of the recorded L3c pyramidal cells. The rebound depolarization amplitude  
339 was significantly larger in L5 pyramidal cells compared to L2/3 and L3c neurons (L2/3:  $1.8 \pm 1.6$  mV, L3c:  
340  $2.9 \pm 1.8$ , L5:  $4.2 \pm 3$  mV,  $p < 0.0001$  between L2/3 and L5; Figure 2C).

341 To further characterize the  $I_h$  specific component of membrane sag voltage, we bath applied the  
342 specific  $I_h$  blocker, ZD7288 (10  $\mu$ m; ZD), with example traces shown in Figure 2D. For L2/3 (n=13), L3c (n=4)  
343 and L5 (n=10) pyramidal cells, after bath-applying ZD we observed a significant reduction in voltage sag  
344 amplitude (L2/3: before  $1.3 \pm 0.9$  mV, after  $0.2 \pm 0.3$  mV,  $p = 0.0005$ , L3c: before  $2.4 \pm 1.4$  mV, after  $0.9 \pm$   
345  $0.9$  mV,  $P = 0.1$ , L5: before  $3.1 \pm 2.8$  mV, after  $0.9 \pm 0.8$  mV,  $p = 0.002$ ; Figure 2E) and in sag ratio (Figure S1B).  
346 Bath applying ZD7288 also significantly reduced the rebound depolarization amplitude (L2/3: before  $1.3 \pm$   
347  $1.1$  mV, after  $-0.8 \pm 1.5$  mV,  $p = 0.001$ , L3c: before  $3 \pm 2.3$  mV, after  $0.9 \pm 1.6$  mV,  $p = 0.1$ , L5: before  $2.1 \pm 1.9$   
348 mV, after  $-1.2 \pm 2.3$  mV,  $p = 0.002$ ; Figure 2F).

349 Whole-cell voltage-clamp experiments were performed in a subset of neurons (L2/3: n= 6, L5: n=  
350 10) to determine if the  $I_h$  amplitude differences arose from differences in channel kinetics between these  
351 two cell-types. While space-clamp issues limit our ability to adequately voltage clamp distal cellular  
352 processes<sup>32</sup>, we nevertheless considered it potentially beneficial to use this technique to obtain semi-  
353 quantitative estimates of the amplitudes, kinetics, and voltage dependence of the  $I_h$  in human pyramidal  
354 cells. We used pharmacological blockers to specifically isolate  $I_h$  (see Methods). We found that injecting  
355 voltage steps from -60 to -140 mV produced a slowly activating, inward current (example traces shown in  
356 Figure S2A). Consistent with our current clamp based results, we found that the amplitudes of the  $I_h$  were  
357 significantly smaller in L2/3 neurons compared with L5 (Figure S2C), whereas the time course of  $I_h$  activation  
358 and the voltage sensitivity of  $I_h$  (quantified at the half maximal activation voltage) was similar between L2/3  
359 and L5 neurons (Figure S2B-D). These results suggest that the relatively larger L5 sag amplitude arises from  
360 increased channel numbers, rather than differences in channel kinetics.

361

362

363

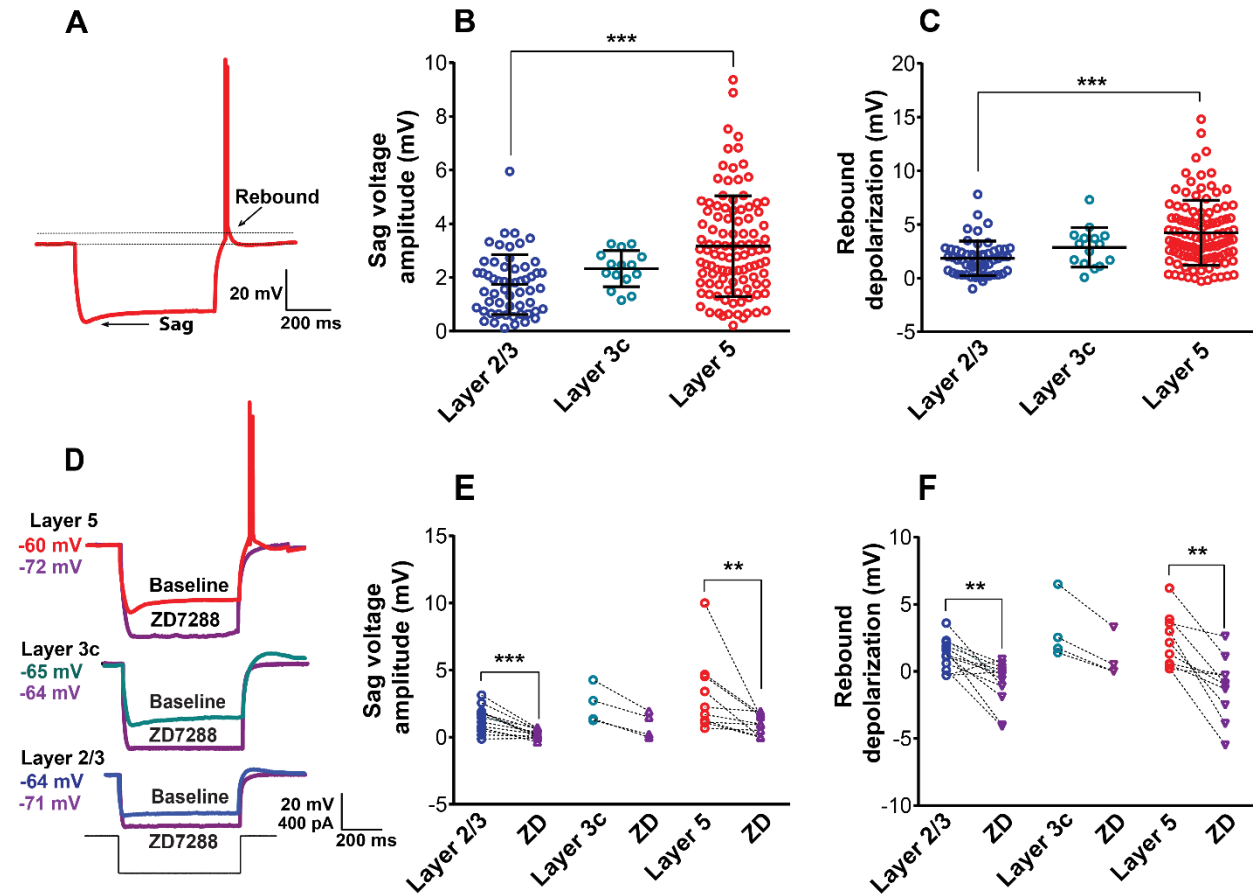

364 **Figure 2.  $I_h$  related membrane properties are more profound in L5 pyramidal cells compared to L2/3 and**  
 365 **L3c. (A)** Example voltage sweep from a representative L5 pyramidal cell during injection of -400 pA  
 366 hyperpolarizing current step. Arrows indicate sag voltage and rebound depolarization and post-  
 367 hyperpolarization rebound spiking. **(B, C)** Sag voltage amplitude (B) and rebound depolarization amplitude  
 368 (C) among sampled L2/3, L3c, and L5 pyramidal cells in response to injection of hyperpolarizing current.  
 369 Lines and error bars denote mean and SD and asterisks indicate significance of group comparison. \*\*\*  
 370 indicates p < 0.001, Wilcoxon non-parametric test. **(D)** Example of voltage sweeps at baseline (red, green,  
 371 and blue) and after (purple) bath application of the  $I_h$  blocker ZD7288 (10  $\mu$ M) following injection of -400  
 372 pA. **(E, F)** Bath application of ZD7288 diminished sag voltage amplitude (E) and rebound depolarization  
 373 amplitude (F) in all layers. \*\* indicates p < 0.01, Wilcoxon non-parametric test.

374

### 375 *3.3. Suprathreshold active membrane properties of pyramidal cells in layers 2/3 and 5*

376

377 Active membrane property differences between layers, was characterized by examining the firing  
 378 patterns of L2/3, L3c and L5 human pyramidal cells (n=55, n=15, n=104 neurons respectively) using a series  
 379 of depolarizing current pulses (0-400 pA, 600ms) with examples shown in Figure 3A, B and C. L5 neurons  
 380 had a significantly larger action potential than L2/3 neurons (L2/3:  $81.9 \pm 13.2$  mV, L3c:  $88.3 \pm 7.5$  mV, L5:  
 381  $88.7 \pm 18.2$  mV, p=0.02; Figure 3D). In addition, the action potential half-width was similar in L5 compared  
 382 to L2/3 (L2/3:  $1.8 \pm 0.6$  ms, L5:  $1.8 \pm 0.7$  ms). However, the half-width of the action potential was

383 significantly longer in L3c pyramidal cells compared to L2/3 and L5 pyramidal cells (L3c:  $2.2 \pm 0.6$  ms,  $p=0.02$ ;  
384 Figure 3F).

385 The frequency-current relationships (f-I curve) showed greater f-I slopes for L5 relative to L2/3 and L3c  
386 neurons (Figure 3G; at 300 pA, L2/3:  $16.3 \pm 12.2$  Hz, L3c:  $11.0 \pm 12.2$  Hz, L5:  $21.8 \pm 13.1$  Hz,  $p=0.0026$   
387 between L2/3 and L5 neurons, and  $p = 0.0011$  between L5 and L3c neurons). The current needed to elicit  
388 an action potential was significantly lower in L5 neurons compared to L2/3 (L2/3:  $162.1 \pm 81.9$  pA, L3c:  
389  $153.5 \pm 66.6$  pA, L5:  $121.1 \pm 85.2$  pA,  $p=0.002$  between L2/3 and L5; Figure 3H). We also note that these  
390 distributions were especially broad, in particular for L5 pyramidal cells, mirroring the large range in input  
391 resistances and diverse morphologies of these neurons (Figure 1). L5 neurons showed significantly less  
392 spike frequency adaptation relative to L2/3 and L3c neurons (L2/3:  $0.16 \pm 0.16$ , L3c:  $0.25 \pm 0.16$ , L5:  $0.11 \pm$   
393  $0.13$ ,  $p=0.01$  between L5 and L2/3,  $p=0.0009$  between L5 and L3c; Figures 3I). Lastly, we identified a small  
394 number of bursting neurons (defined as those with instantaneous frequencies at rheobase  $> 75$  Hz) in our  
395 dataset (e.g., the L5 cell illustrated in Figure 3C and further examples in Figure S3). Specifically, we found  
396 14% of our recorded L2/3 pyramidal cells and 9.5% of L5 pyramidal cells showing bursting activity. The  
397 overall low number of bursting neurons in both superficial and deeper cortical layers of human neocortex  
398 are consistent with previous report of infrequent bursting in human neocortex<sup>3</sup>.

399

400

401

402

403

404

405

406

407

408

409

410

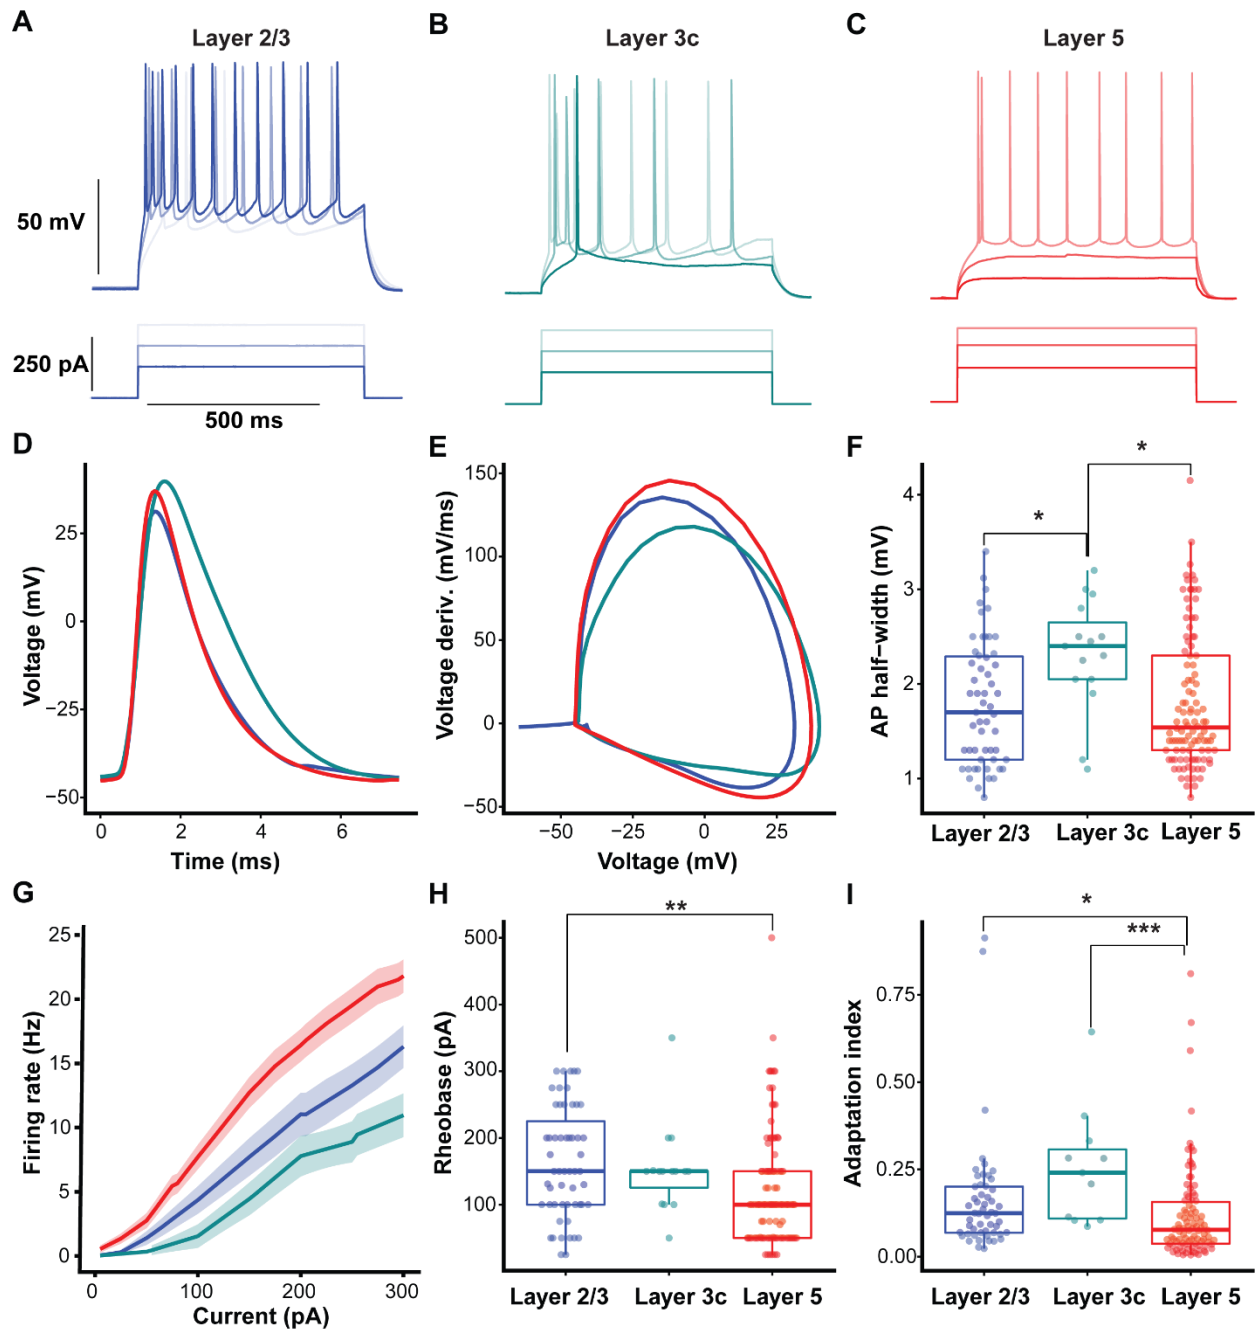

411

412 **Figure 3. L5 pyramidal cells display higher frequency firing rate and less adaptation than L2/3 and**  
 413 **L3c neurons. (A, B, C)** Example L2/3, L3c and L5 pyramidal cell voltage responses following depolarizing  
 414 current injections (150 pA, 250 pA and 300 pA, 600 ms). **(D, E)** Action potential waveform (D) and action  
 415 potential phase plot (E) averaged over recorded pyramidal cells in each layer. **(F)** L5 pyramidal cells had a  
 416 smaller action potential half-width compared to L2/3 and L3c neurons which was not significant in  
 417 comparison with L2/3 neurons. Half-width of action potential was higher significantly in L3c pyramidal cells  
 418 compared with L2/3 and L5 neurons. **(G)** Current versus firing rate relationships (FI curves), averaged over  
 419 pyramidal cells recorded in each layer. Shaded bands indicate SEM. **(H)** L5 pyramidal cells needed less  
 420 depolarizing current to display first action potential compared to L2/3 and L3c neurons. **(I)** L5 pyramidal  
 421 cells show less spike frequency adaption, quantified using the adaptation index measure, in comparison

422 with L2/3 and L3c. \*\*\* indicates  $p < 0.001$ , \*\* indicates  $p < 0.01$ , \* indicates  $p < 0.05$ , Wilcoxon non-  
423 parametric test.

#### 424 *3.4. Subthreshold and suprathreshold resonance in human pyramidal cells across cortical layers*

425 Resonance is a common approach to characterize the frequency preferences of neurons and  
426 represents the net result of the interaction between passive and active properties<sup>42</sup>. Moreover,  $I_h$  is an  
427 active current shown to contribute to low pass filtering properties of pyramidal cells due to its slow  
428 activation and deactivation<sup>22</sup>. Indeed, human pyramidal cells, and in particular those in deeper part of L3  
429 as well as thick-tufted neurons in L5, can exhibit low frequency subthreshold resonance<sup>3,4</sup>. These findings  
430 in human neurons are consistent with studies in rodent cortex that describe the correlation between a  
431 large sag voltage and low frequency resonance<sup>33</sup>.

432 We examined subthreshold resonance in our recorded L2/3, L3c and L5 pyramidal cells using a 20s-  
433 long frequency-modulated (or ZAP) current stimulus delivered at the resting potential<sup>22</sup>. Our analysis  
434 revealed clear examples of resonant pyramidal cells in each of the 3 major layers we profiled (Figure 4A  
435 and B). Our analyses identified a number of neurons that displayed a non-zero peak in their resonant  
436 frequency (fR; 27% of L2/3 neurons; 47% of L3c neurons; and 40% of L5 neurons) but considerably few  
437 neurons with resonant frequencies greater than 2Hz (Figure C). We found qualitatively similar results when  
438 repeating the ZAP current injection while holding neurons near -80 mV in a subset of neurons (data not  
439 shown). We found there was a slight trend for a decrease in the 3 dB cutoff frequency in L5 relative to L2/3  
440 neurons ( $p = 0.05$ , Figure 4D). These results are generally consistent with recent evidence for greater  
441 subthreshold resonance in the deeper part of the supragranular layers of the human neocortex relative to  
442 more superficial neurons<sup>4</sup>. However, based on prior work<sup>3</sup> we were surprised that subthreshold  
443 resonance, was not more prevalent in these data (see Discussion).

444 We further compared the frequency response characteristics of L2/3 and L5 pyramidal cells in  
445 response to suprathreshold ZAP current injections, with example traces shown in (Figure 4E). We found  
446 that L5 neurons spike with greater fidelity to higher frequency stimuli (12-18 Hz) relative to L2/3. We did  
447 not observe a difference in frequency tracking at other frequency ranges (Figure 4F), including frequencies  
448 at delta or theta (1-8 Hz).

449

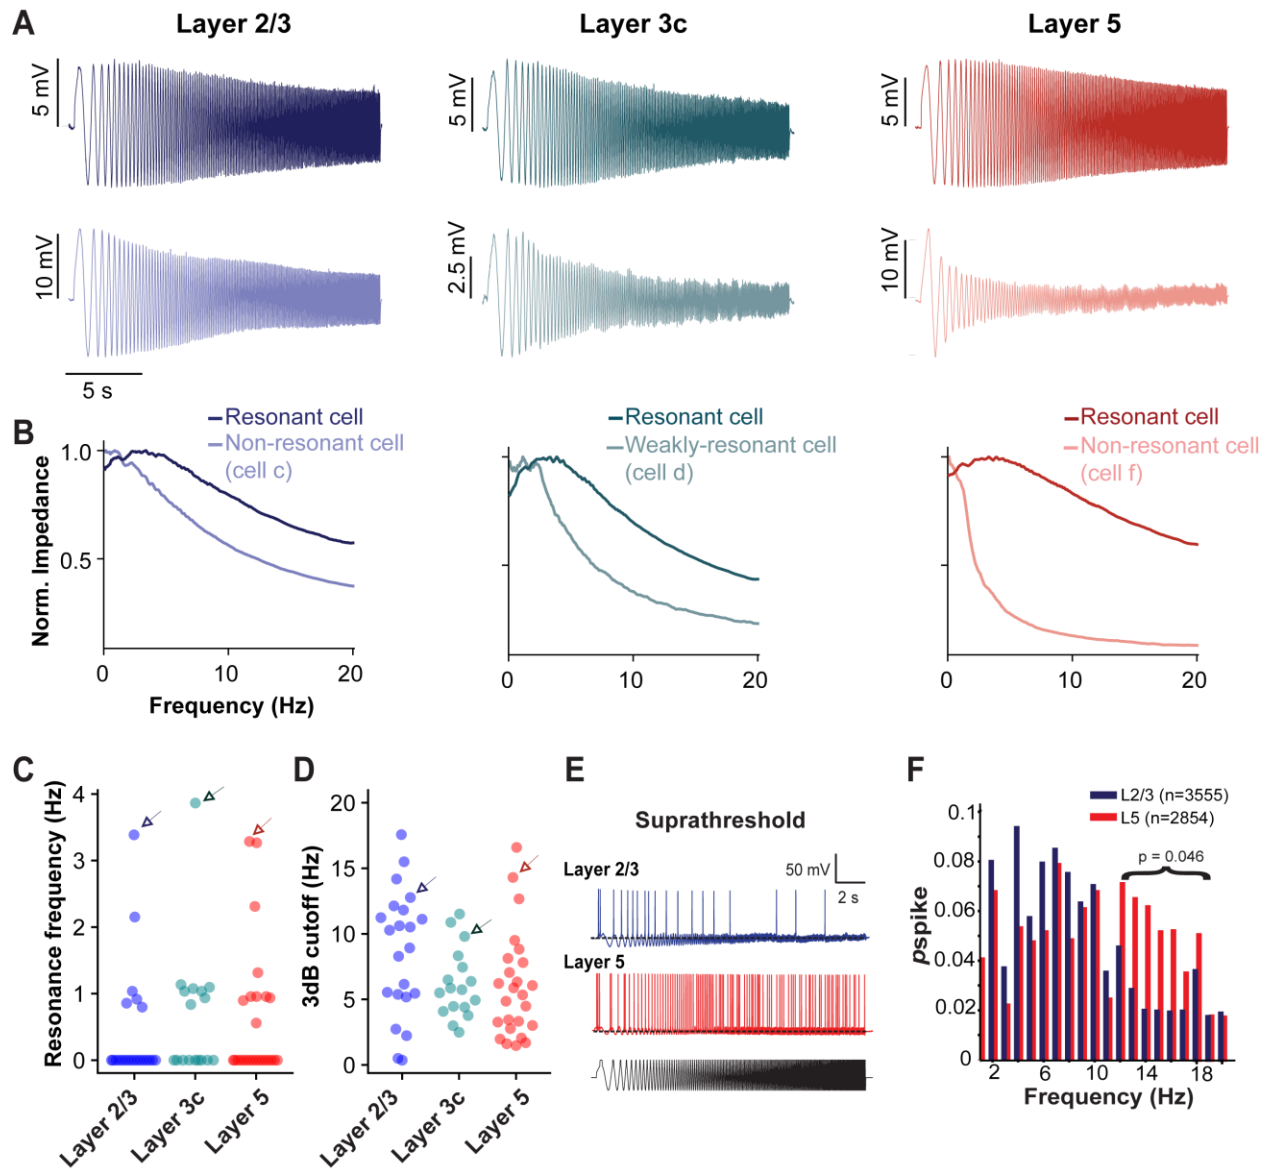

450

451 **Figure 4. Subthreshold and suprathreshold resonance properties of L2/3, L3c and L5 pyramidal**  
 452 **cells. (A)** Example voltage responses following injection of subthreshold frequency-modulated (ZAP)  
 453 current delivered at resting potential in L2/3, L3c and L5 pyramidal cells. Voltage traces are averaged across  
 454 5 repeated trials. Top voltage trace indicates response for an example cell displaying subthreshold  
 455 resonance and bottom trace indicates response for a non-resonant cell. Cell labels are provided below in B  
 456 and naming of cells corresponds to example cell morphologies shown in Figure 1. **(B)** Normalized  
 457 impedance profiles for the voltage traces shown in A, with impedances normalized to a maximum value of  
 458 one. **(C, D)** Resonance frequencies (C) and 3dB cutoff frequencies (D) indicate that there are relatively few  
 459 strongly resonant pyramidal cells in our dataset. Arrows in C and D correspond to resonant cells highlighted  
 460 in A and B. A subset of recorded neurons were recorded in the presence of synaptic blockers. **(E)** Example  
 461 voltage responses following injection of suprathreshold ZAP current. **(F)** Spike response probability in  
 462 response to suprathreshold current injection show that L2/3 and L5 pyramidal cells track theta frequencies



463 with high fidelity. The distributions were not significantly different ( $KSp = 0.53$ ). Above 12Hz spike  
464 probabilities differed significantly between L2/3 and L5.

465 *3.5. Putative interneurons recorded in L5 show greater amounts of sag and subthreshold resonance relative*  
466 *to L2/3*

467 Our data set also included a number of putative GABAergic interneurons (examples in Figure 5A;  
468 L2/3: n= 10, L5: n= 14). We were able to distinguish putative interneurons from pyramidal cells by their  
469 action potential characteristics (Figure 5B, C), large maximal firing rates, and typically large spike after-  
470 hyperpolarization amplitudes (see Fig S4 for morphological corroboration for one putative interneuron  
471 from our dataset). In the context of previous results<sup>4</sup> and our current ones, we were curious if the general  
472 organizing principle of increased sag with increased depth from pia held for this class of neurons too.

473 Indeed, the set of putative interneurons in L5 had significantly larger sag voltage amplitudes  
474 compared to putative interneurons in L2/3 (L2/3:  $1.2 \pm 1.1$  mV, L5:  $4.5 \pm 3.7$  mV,  $p=0.001$ ; Figure 5D).  
475 Moreover, L5 putative interneurons had significantly larger rebound depolarization amplitudes relative to  
476 L2/3 putative interneurons (L2/3:  $1.7 \pm 2.2$  mV, L5:  $5.2 \pm 3.2$  mV,  $p=0.003$ ; Figure 5E). These results mirror  
477 our overall findings in the analogous pyramidal cells from these layers. Moreover, while there was a  
478 relatively small number of interneurons that were characterized with ZAP current injection (examples in  
479 Figure 5F-G), we noticed a comparatively large fraction of L5 putative interneurons that displayed a non-  
480 zero peak in their resonant frequency (3 of 6 neurons) compared to L2/3 (1 of 3 neurons) (Figure 5H).  
481 Although a small number of neurons and thus requiring corroboration, these data are consistent with prior  
482 reports of strong subthreshold resonance activity in human cortical GABAergic interneurons<sup>5</sup> and in rodent  
483 hippocampal interneurons<sup>43</sup>. These results suggest that depth from pia appears is certainly a general  
484 organizing principle for sag current in the cortex for both excitatory and inhibitory neurons.

485

486

487

488  
489  
490  
491  
492  
493  
494  
495  
496  
497  
498  
499  
500  
501  
502  
503  
504

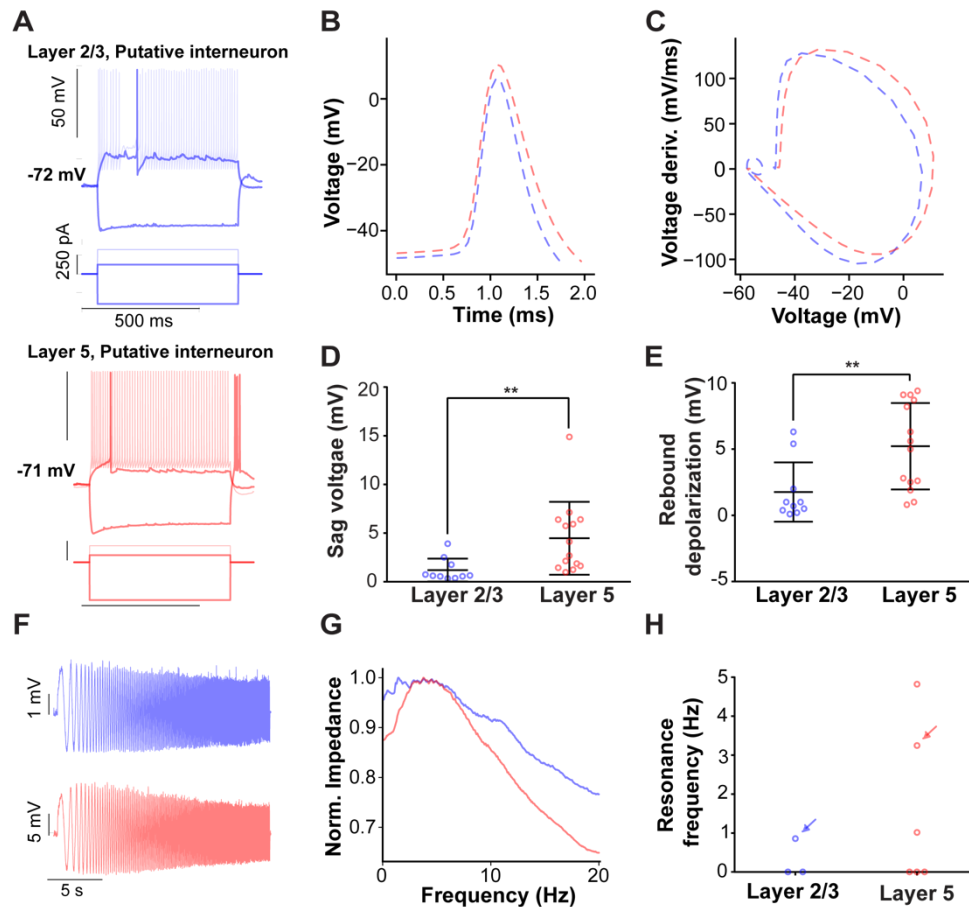

505 **Figure 5. Electrophysiological and subthreshold resonance properties of putative interneurons**  
 506 **recorded in L2/3 and L5. (A)** Example voltage responses and current steps for an example putative  
 507 interneuron from a L2/3 (top) and L5 (bottom). **(B, C)** Action potential waveform (B) and action potential  
 508 phase plot (C) averaged over recorded putative interneurons in L2/3 (blue) and L5 (red). **(D, E)** Sag  
 509 amplitude (D) and post-hyperpolarization rebound depolarization amplitude (E) reveals greater amounts  
 510 of sag and rebound depolarization amplitude in L5 putative interneurons compared to L2/3. \*\* indicates  
 511  $p < 0.01$ , Wilcoxon non-parametric test. **(F, G)** Example subthreshold voltage responses (F) and normalized  
 512 impedance (G) following ZAP current injection for example neurons shown in A. **(H)** Subthreshold  
 513 resonance frequencies show a trend for more subthreshold resonance in L5. Arrows indicate neurons  
 514 highlighted in F.

515 *3.6. Considerable heterogeneity and overlap in electrophysiological features among pyramidal cells sampled*  
 516 *across different layers of the human neocortex*

517 Given the large degree of variability among intrinsic electrophysiological features in the pyramidal  
 518 cells in our study, we next sought to identify gradients or sub-clusters among these neurons. For example,  
 519 in rodent neocortex, there is strong convergent evidence that pyramidal cells from L5 are split into two  
 520 major subclasses, with neurons from L5a more likely to be regular spiking, intra-telencephalic projecting  
 521 (IT). Such neurons show slender tufted dendritic morphologies compared to pyramidal cells in L5b, which  
 522 are more likely to be bursting, extra-telencephalic (ET), and show thick-tufted dendritic morphologies<sup>44,45</sup>.  
 523 While in human neocortex there is some recent evidence for this dichotomy based on transcriptomics data,

524 with the implication that there are likely far fewer ET neurons than IT neurons in L5 relative to the rodent  
525 setting<sup>46</sup>, to our knowledge this has yet to be corroborated at the electrophysiological and morphological  
526 levels.

527 We addressed this question using dimensionality reduction techniques to arrange our neurons by  
528 similarity in multi-variate sets of electrophysiological features (L2/3: n= 56, L3c: n = 14, L5: n= 103 neurons).  
529 We specifically used UMAP<sup>34</sup>, using 14 subthreshold and suprathreshold electrophysiological features that  
530 were consistently calculated in the majority of pyramidal cells within our dataset (see Methods). We found  
531 some evidence for gradients and/or subclusters among the sampled neurons based on the input  
532 electrophysiological features (Figure 6A). Upon further inspection, we found that a single major factor,  
533 related to cell input resistance and rheobase current, appeared to qualitatively define the major gradient  
534 underlying the differences in neurons highlighted by this analysis (Figure 6B). We were able to corroborate  
535 aspects of this unbiased analysis through inspection of pyramidal cell morphologies (where available), with  
536 neurons at one extreme of the gradient having the largest input resistances and the most simple  
537 morphologies (e.g., cell a and cell f from Figure 1). Similarly, neurons with morphologies on the other side  
538 of the gradient tended to have lower input resistances and more complex morphologies, such as the  
539 putative thick-tufted cell (cell g) shown in Figure 1. This analysis also revealed that neurons throughout the  
540 gradient tend to show bursting behavior (Figure 6C) and that neurons with intermediate input resistances  
541 (such as those sampled from L3c) are more likely to display subthreshold resonance (Figure 6D).

542 The other major finding of this analysis is that neurons from each of the layers we sampled were  
543 often inter-mixed in the low-dimensional space, with neurons from L2/3 often displaying very similar  
544 electrophysiological profiles to those sampled in L5. The pyramidal cells sampled from L3c were one  
545 exception, however, as these were present primarily at a single position in the low-dimensional space, along  
546 with other neurons of intermediate input resistance. As we did not see strong evidence for a subtype of L5  
547 neurons that were electrophysiologically distinct from those in L2/3 and other L5 neurons, we conclude  
548 that either we do not have L5 ET neurons present in our dataset or that we are unable to distinguish them  
549 from IT neurons using these electrophysiological features alone (see Discussion).

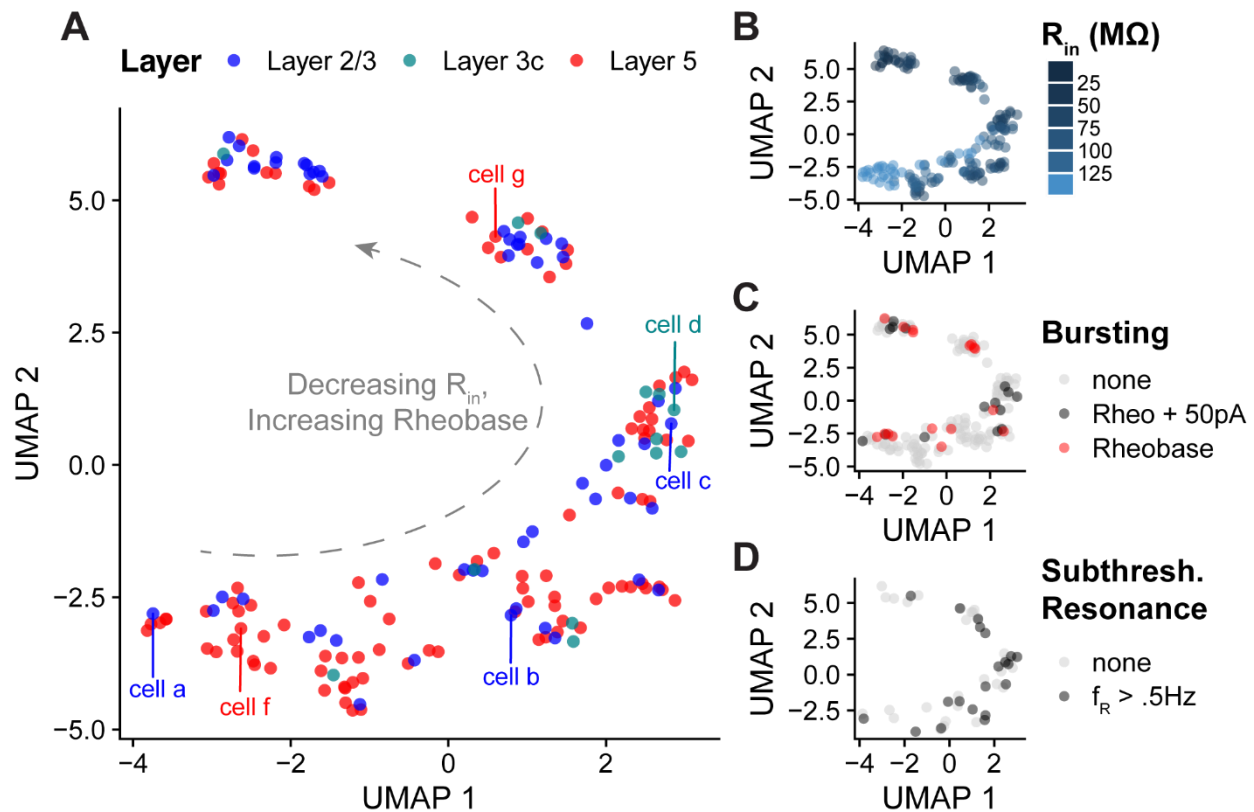

550

551 **Figure 6. Dimensionality reduction reveals considerable intrinsic electrophysiological similarity and**  
 552 **overlap between pyramidal cells recorded in different layers.** (A) Dimensionality reduction analysis  
 553 performed on multivariate sets of electrophysiological features using Uniform Manifold Approximation  
 554 (UMAP). Neurons are arranged by similarity in intrinsic electrophysiological features (see methods for list  
 555 of features used in analysis). Cell labels correspond to neurons whose morphologies are highlighted in  
 556 **Figure 1.** (B-D) Same as A, but neurons are colored by input resistance (B), bursting behavior (C), or  
 557 subthreshold resonance (D). Bursting behavior in C is broken down by neurons that show no bursting,  
 558 neurons that burst at rheobase current plus 50 pA, or neurons that burst at rheobase. Bursting is defined  
 559 where the instantaneous firing rate is greater than 75 Hz.

560 *3.7. Assessment of frequency-dependent gain reveals greater preference for delta and theta frequencies*  
 561 *among L5 relative to L2/3 pyramidal cells*

562 The frequency and phase preference of spike generation will determine a neurons ability to  
 563 participate in the amplification/generation of oscillations<sup>21</sup> and as a “synchrony filter”<sup>47</sup>. To quantify this  
 564 property, we characterized the frequency dependent suprathreshold spiking properties of L2/3 and L5  
 565 pyramidal cells, in a subset of neurons (n=8 neurons each for L5 and L2/3) from an additional set of patients  
 566 (n=5). We stimulated neurons with multiple trials of a frozen filtered white noise current stimulus. We used  
 567 this stimulus to compute the frequency dependent gain [ $G(f)$ ] and the mean phase shift of the spike  
 568 response (Figure 7A)<sup>35</sup>. The frequency dependent gain,  $G(f)$ , quantifies the phase preference of neuronal  
 569 spiking as function of frequency<sup>48</sup>; intuitively, neurons with a high gain at a specific frequency are more  
 570 likely to fire in phase with a sine-wave at that frequency than at other frequencies.

571 We found both that L2/3 and L5 neurons displayed peaks in  $G(f)$  within the delta and theta  
 572 frequency ranges (Figure 7B). Both peaks were more pronounced in L5 pyramidal cells compared to L2/3  
 573 ( $p < 0.05$ ). Additionally, above 10Hz, we found that L5 pyramidal cells displayed greater frequency

574 dependent gain than L2/3 neurons, consistent with the suprathreshold ZAP results. The greater excitability  
575 and fidelity of L5 neurons was also evident in their phase curves and spike triggered averages (STAs) (Figure  
576 7C, D). L2/3 neurons demonstrated a greater lag in firing than L5 neurons, and their STA were of larger  
577 amplitude with steeper slopes. This suggests that L2/3 neurons require larger inputs to trigger spikes, and  
578 when they do spike, they will lag behind L5 pyramidal cells if inputs are coincident.

579 We more precisely explored the potential contribution of  $I_h$  to low frequency rhythms via its  
580 influence on  $G(f)$ . For both L2/3 (n=3, Figure 7E) and L5 pyramidal cells (n=3, Figure 7F), ZD7288 (an  $I_h$   
581 blocker) was applied to compare  $G(f)$  before and after abolishing the  $I_h$ . We found that blocking  $I_h$   
582 predominantly abolished the delta peak in L5 neurons, and to a lesser extent the theta peak in both L2/3  
583 and L5 neurons. These data indicate that L5 pyramidal cells are better at tracking both delta and theta  
584 frequency inputs than superficial layer neurons (although L3c neurons were not tested in this way), and  
585 that the larger the  $I_h$  in L5 pyramidal cells imbues them with increased responsiveness to delta frequency  
586 inputs.

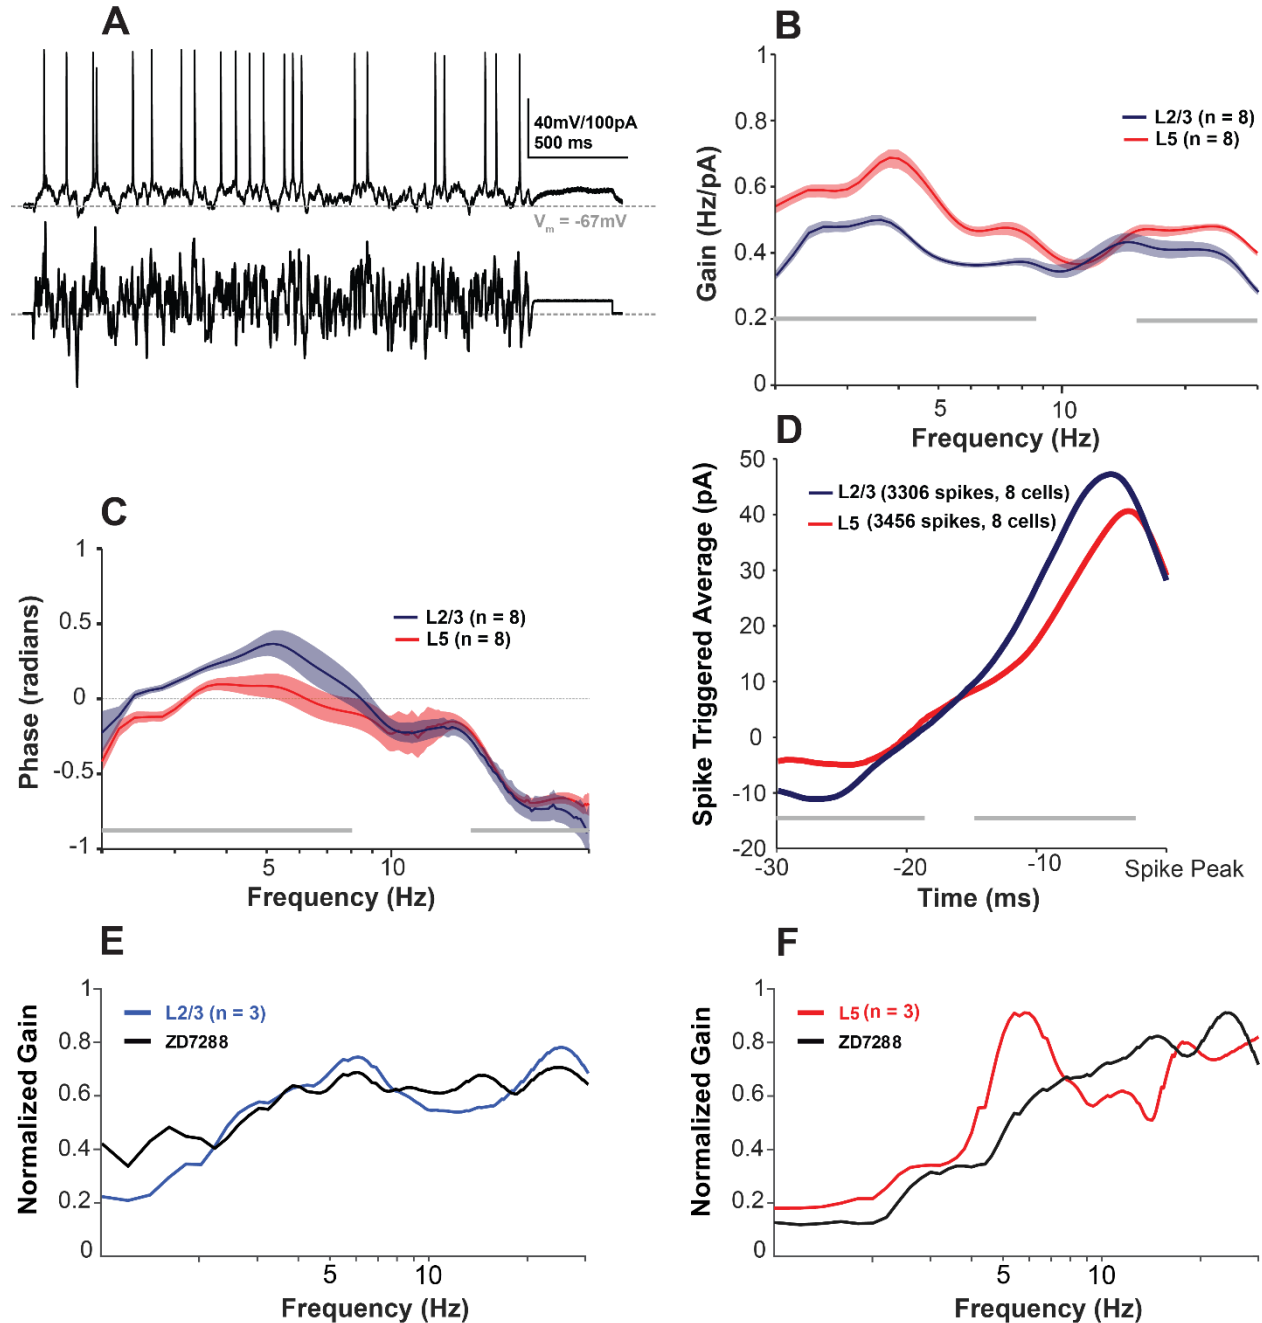

587 **Figure 7: Human L5 neurons display greater gain at delta and theta frequencies than L2/3**  
 588 **pyramidal cells.** (A) Example of  $V_m$  response to 2.5s of frozen filtered noise current injection stimulus for a  
 589 L5 pyramidal cell. (B) Frequency dependent gain profile of L2/3 and L5 pyramidal cells over a wide range of  
 590 frequencies. Frequency dependent gain,  $G(f)$ , was calculated with frequency-dependent windowing (see  
 591 Materials and Methods). Both layers show two peaks around 2.5-10 Hz, and 12-16 Hz which are more  
 592 pronounced in L5 pyramidal cells compared to L2/3. Gray horizontal bars represent significant differences  
 593 between groups. (C) Phase shift of spiking relative to input stimulus. L2/3 pyramidal cells show positive  
 594 phase in their mean phase shift profile which represents a lag in L2/3 pyramidal cells compared to L5  
 595 pyramidal cells. (D) Mean spike triggered average (STAs) for L5 and L2/3 neurons. Difference in STAs  
 596 indicate L5 neurons require less current and instantaneous rate of current increase to initiate a spike

597 (greater excitability). (E, F) Frequency dependent gain profile of L2/3 (E) and L5 (F) pyramidal cells before  
598 and after  $I_h$  blocker (ZD7288 10  $\mu$ M). ZD7288 abolished the low frequency peaks in L5 neurons with little  
599 change in frequency dependent gain in L2/3 neurons.

### 600 *3.8. Replication of major findings in an additional cohort of patients and identification of a provisional* 601 *relationship between sag and patient age*

602 To close, we wondered if the major findings of this work would generalize if tested in an additional  
603 group of human neurosurgical patients. To this end, we utilized a publicly-accessible dataset of 272  
604 pyramidal cells sampled from L2, L3, and L5 from an additional cohort of 39 human surgical patients  
605 characterized by the Allen Institute for Brain Sciences (<http://celltypes.brain-map.org/>). We note that while  
606 the overall experimental design of the Allen Institute's dataset is similar to ours, there are some key  
607 methodological differences, such as the composition of solutions used for slice preparation and recording  
608 (see Methods). In addition, because of differences in the amplitudes of hyperpolarizing current steps used  
609 to assess sag, we chose to cross-compare these datasets using the dimensionless sag ratio measure,  
610 defined as the ratio between the sag amplitude and the hyperpolarization-evoked peak voltage deflection  
611 from the resting potential. We note that sag ratio is positively correlated with sag amplitudes (Figure S5,  $r$   
612 = 0.68). One final caveat with the Allen Institute dataset is that L5 pyramidal cells have not been annotated  
613 for the ET or IT subtype, similar to our own dataset.

614 We were able to use the Allen Institute cohort to replicate our primary finding that L5 pyramidal  
615 cells have larger sag ratios than pyramidal cells in L2 and L3 (Fig S6; L2:  $0.51 \pm 0.045$ ; L3:  $0.125 \pm 0.067$ ; L5:  
616  $0.149 \pm 0.072$ ;  $p = 2.21 \times 10^{-6}$  between L2 and L3,  $p = 0.012$  between L3 and L5). Similarly, these data are  
617 consistent with our finding that input resistances in L5 pyramidal cells are not smaller than those sampled  
618 in human L2 and L3 (Figure S7A; L2:  $105 \pm 49.9$ ; L3:  $89.7 \pm 57.7$ ; L5:  $170 \pm 74.7$ ) and that trend holds even  
619 in neurons where the primary dendrites are not visibly truncated (Figure S7B).

620 Lastly, we investigated if some of the cell-to-cell variability in sag could be in part explained by  
621 patient-level demographic features, such as patient age at time of surgery. To address this question, we  
622 cross-referenced our recordings with basic demographic information from patient medical records where  
623 available, yielding a total of 137 pyramidal cells sampled from L2/3 and L5 in 42 patients. In the L5 pyramidal  
624 cells sampled in our dataset (the Krembil Institute cohort), we found that there was a trend for neurons  
625 recorded from older patients tended to have larger sag ratios than those from younger patients (Figure 8A,  
626  $r = 0.21$ ,  $p = 0.10$ , based on a mixed-effects statistical model with subject ID as a random effect, see  
627 Methods). When we investigated analogous L5 pyramidal cells from the Allen Institute cohort, we found a  
628 consistent relationship between patient age and sag ratios that was statistically significant (Figure 8B,  $r =$   
629  $0.30$ ,  $p = 0.014$ ). Assessing this relationship in L2/3 pyramidal cells, we found a similar overall relationship  
630 in data from the Krembil Institute cohort (Figure 8C,  $r = 0.36$ ,  $p = 0.022$ ). While we found a relationship in  
631 the same direction in the Allen Institute cohort for L2/3 neurons, we note that the relationship was not  
632 statistically significant (Figure 8D,  $r = 0.11$ ,  $p = 0.30$ ), possibly due to differences in the relative compositions  
633 of L2 versus L3 pyramidal cells sampled in each cohort and the confound that differences in somatic depth  
634 among L3 pyramidal cells also influence the amount of sag observed<sup>4</sup>. Given the challenges in comparing  
635 neurons recorded across patients (e.g., this analysis likely pools neurons sampled from different cell types,  
636 like ET vs IT), we note that these correlations should be seen as provisional. Moreover, it is possible these  
637 correlations may not be replicated in other cohorts; for example, in a recent study of L5 human pyramidal  
638 cells<sup>3</sup>, no correlation between age and dendritic sag magnitudes were observed.

639

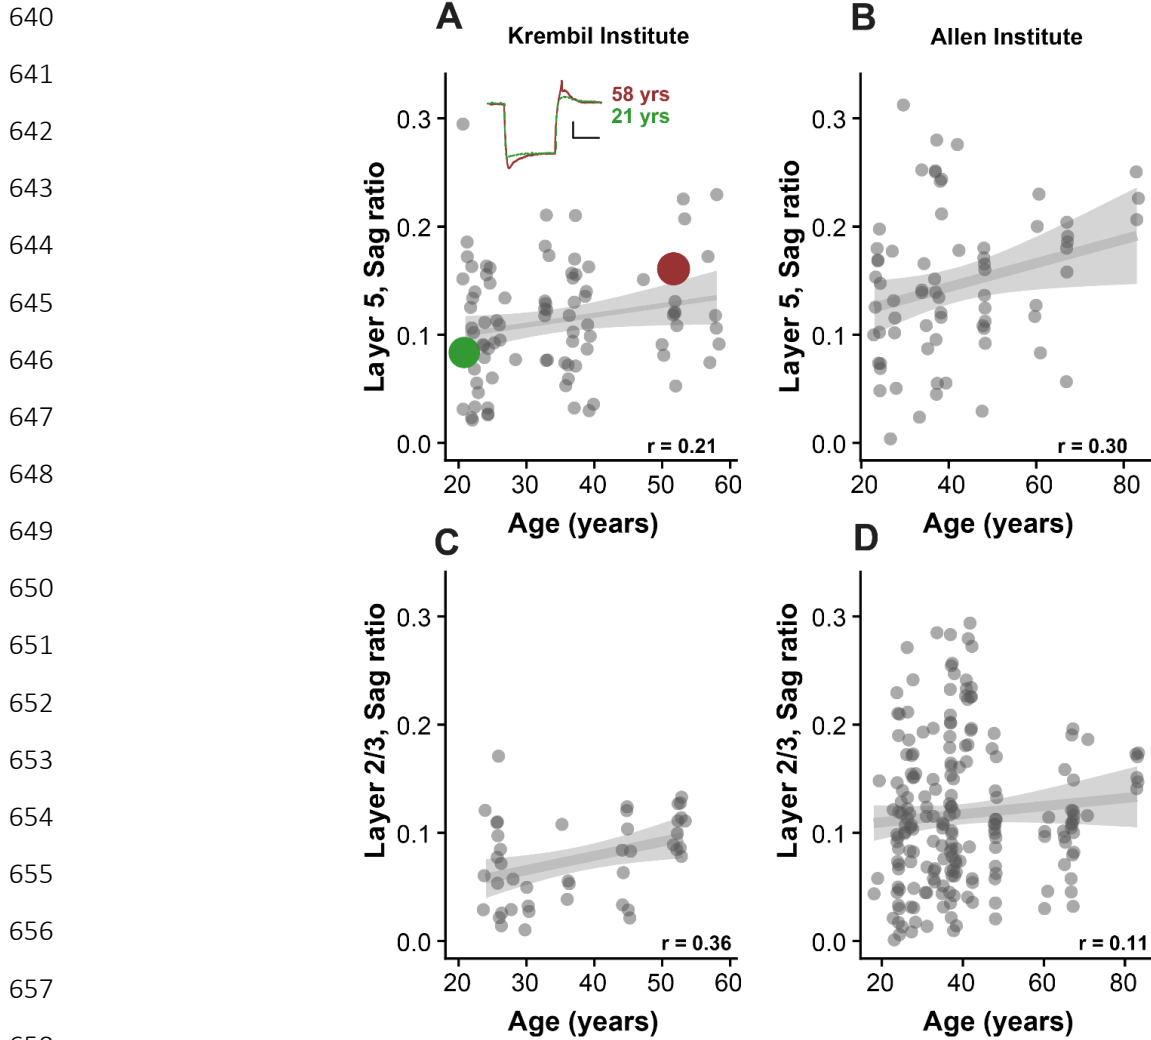

659 **Figure 8: Correlation between pyramidal cell sag ratios and patient age.** (A) L5 pyramidal cell sag  
660 ratio values as a function of patient age for neurons sampled from the Krembil Institute cohort. Each grey  
661 dot reflects one cell and multiple neurons are typically sampled per patient. Inset shows example voltage  
662 trace data for two representative neurons. Grey line indicates linear fit. Inset correlation values based on a  
663 linear mixed effects model. (B) Same as A, but for data from the Allen cohort. (C-D) Same as A and B, but  
664 for L2/3 pyramidal cells sampled from the Krembil Institute cohort (C) or the Allen Institute cohort (D).

665

#### 666 4. Discussion

667 Guided by our previous work implicating deep layer human pyramidal cells in driving coherent low  
668 frequency oscillations in human neocortex, we sought to characterize the electrophysiological differences  
669 between deep and superficial human pyramidal cells. We summarize five major findings from this work:

670

671 First, considering each broad cortical layer as a group, we found that there is a gradient of increased  
672 excitability from superficial to deeper layer pyramidal cells, with L2/3 pyramidal cells demonstrating more  
673 hyperpolarized resting potentials, lower input resistances and larger rheobase required for spike



674 generation, enhanced spike frequency adaptation, and steeper and larger amplitude spike triggered  
675 averages. Along most of these features, the neurons sampled from L3c were often at an intermediate point  
676 between L2/3 and L5.

677  
678 Second, we found enhanced sag and  $I_h$ -related features in L5 neurons relative to L2/3 neurons,  
679 again with L3c neurons intermediate between these groups.  $I_h$  appeared to be one of the major  
680 contributors to the prominent rebound depolarization and rebound spiking in human L5 neurons, as  
681 ZD7288 significantly reduced both.  $I_h$  also contributes to enhanced frequency-dependent gain at delta and  
682 theta frequencies and is more prominent in L5 relative to L2/3 pyramidal cells, which we could abolish using  
683 ZD7288. Intriguingly, we found anecdotal evidence that  $I_h$  appears more prominent in L5 relative to L2/3  
684 putative GABAergic interneurons, and that this might contribute to enhanced resonant activity in these  
685 neurons.

686  
687 Third, we found a number of pyramidal cells displaying subthreshold resonance, with the greatest  
688 fraction of resonant neurons observed in L3c. These findings support previous reports of strong  
689 subthreshold resonance in pyramidal cells, in particular in the deeper parts of L3 and in larger, thick-tufted  
690 neurons in L5<sup>3,4</sup>.

691  
692 Fourth, we found a great degree of electrophysiological heterogeneity among pyramidal cells  
693 sampled within each cortical layer, and that this heterogeneity in part reflects coordinated complexity in  
694 dendritic morphologies. Mirroring recent reports that there is great deal of variability in morpho-electric  
695 and transcriptomic subtypes of L2 and L3 pyramidal cells<sup>4,41</sup>, we found that there is a similar (and possibly  
696 even greater) amount of electrophysiological variability among human L5 pyramidal cells. One source of  
697 the variability, in L5 in particular, could be the known dichotomy between extra-telencephalic (ET) and  
698 intra-telencephalic (IT) projecting neurons, as has been extensively described in rodents<sup>44,45</sup>. In contrast to  
699 a recent report from human L5 that specifically targeted large thick-tufted neurons<sup>3</sup>, the majority of the  
700 L5 neurons sampled here show relatively high input resistances (>90 M $\Omega$ ), and we hypothesize are thus  
701 likely to be thin-tufted, IT pyramidal cells. While our sampling of neurons is not without its own biases, our  
702 sampling of L5 neurons is consistent with recent transcriptomic evidence suggesting that the vast majority  
703 of excitatory neurons in human L5 are likely to be IT, in stark contrast to the rodent setting<sup>46</sup>. However, an  
704 additional explanation for the variability could be within cell type heterogeneity, which is increasingly  
705 recognized as an important and biologically meaningful aspect of neural circuits<sup>49</sup>.

706  
707 Fifth, leveraging the large sample of patients in our study, we found suggestive evidence that  
708 pyramidal cells from recorded older patients tended to show greater amounts of sag relative to pyramidal  
709 cells recorded in younger patients. By replicating this finding using publicly accessible data collected by the  
710 Allen Institute from a second cohort of human patients, we were able to gain additional confidence in the  
711 generalizability of this relationship.

712

#### 713 *4.1. Relationships between $I_h$ and cortical rhythmogenesis in human pyramidal cells*

714 Given our findings of greater  $I_h$  in L5 neurons, we were initially surprised that a larger number of  
715 neurons did not demonstrate a peak in subthreshold resonance. For example, a previous report by  
716 Kalmbach, B et. al (2018) suggested that  $I_h$  contributes to prominent subthreshold resonance in deep L3  
717 human pyramidal cells<sup>4</sup>. Similarly, somatic subthreshold resonance has also been reported in human L5  
718 thick-tufted neurons<sup>3</sup>. In addition, previous work in rodents has shown that L5 pyramidal cells are

719 associated with the genesis of subthreshold frequency resonance<sup>8,50-52</sup>. It has been proposed that this band  
720 pass filtering is mediated by interactions between  $I_h$ <sup>50</sup>, persistent Na<sup>+</sup> current ( $I_{NaP}$ ),  $I_{IR}$  (instantaneously  
721 activating, inwardly rectifying K<sup>+</sup> current)<sup>51</sup>, M-current and passive properties of L5 pyramidal cells<sup>52</sup>.  
722 However, previous investigations of subthreshold resonance have shown that  $I_h$  alone is not sufficient to  
723 account for the high pass filtering that gives rise to a resonant peak; in fact, it is likely a more complex  
724 interaction of the presence of  $I_h$ , along with the kinetics of this channel, the neuron's morphology, and its  
725 passive properties that dictates whether a cell will demonstrate a low frequency resonant peak.

726 Hippocampal oriens-lacunosum molecular (OLM) interneurons, for example, exhibit a large  
727 characteristic sag, indicative of the presence of  $I_h$ , without displaying subthreshold resonance<sup>43</sup>. When  
728 comparing OLM neurons to CA1 pyramidal cells as well as oriens-radiatum (OR) interneurons that have  $I_h$   
729 and resonance, Zemankovics, R et. al. (2010) identified minimal difference in the  $I_h$  conductance between  
730 the three neuron types. Instead, a significant difference in the voltage dependence of the h-channel kinetics  
731 was identified between the two interneuron types and the pyramidal cells, but not between the OLM and  
732 OR interneurons, indicating that these kinetics might account for some, but not all, of the tendency of these  
733 neurons to resonate. Zemankovics, R et. al. (2010) further suggest that differences in passive properties  
734 between the OLM and OR neurons underlie the different resonance characteristics in these interneurons  
735<sup>43</sup>. The work of Hu, H et. al. (2002) identified multiple mechanisms by which resonance can occur, including  
736 one mediated by the M-current<sup>22</sup>. Additionally, in inferior olivary neurons it is the low threshold calcium  
737 current that underlies these neurons' low frequency resonance<sup>53</sup>. These results imply that  $I_h$  is neither  
738 necessary nor sufficient in the generation of low frequency resonance. Taken together, they also suggest a  
739 more complicated picture of the relationship between the presence of  $I_h$  and the capacity for a neuron to  
740 exhibit subthreshold resonance, a situation wanting for computational modeling and in silico explorations  
741 to help fully describe this aspect of human L5 physiology<sup>15</sup>.

742 Recently a putative 'dynamic circuit motif' (DCM)<sup>21</sup> has been proposed to underlie the interlaminar  
743 nested delta-theta oscillations observed in rodents. This DCM posits intrinsically-bursting (IB), ET neurons  
744 in L5 neurons as a central actor in generating deep layer activity that drives superficial theta oscillations<sup>54</sup>.  
745 Although, the electrophysiological signature and experimental conditions studied in Carracedo, L et. al.  
746 (2013) were different than our studies in human cortical slices, it is instructive to relate our findings to what  
747 was observed in rat neocortex. Carracedo, L et. al. (2013) demonstrated that delta oscillations likely occur  
748 due to tonic drive to the dendrites of IB neurons in superficial layers. This tonic drive causes the IB neurons  
749 to discharge bursts at delta frequencies (~2Hz). IB neurons are unique in that, in addition to their subcortical  
750 targets, they primarily synapse locally within deep layers on L5 regular-spiking (RS) IT neurons, unlike L5 RS  
751 neurons that project axons both locally and to L2/3<sup>45,55,56</sup>. The RS neurons are thus driven by periodic  
752 barrages at delta frequencies and discharge doublets with each IB burst, thus generating "theta" frequency  
753 output at double the L5 delta frequency that is transmitted to superficial layers. The sinks generated in the  
754 superficial layers thus occur at theta frequency, driving local excitability in L2/3 with the resultant increase  
755 in excitatory drive to L5 IB dendrites and the cycle begins.

756 Our results demonstrating 4 and 8Hz peaks in  $G(f)$  for L5 RS neurons interpreted in the context of  
757 the above findings by Carracedo, L, et al (2013) provides a possible mechanism for the theta activity (~8Hz)  
758 that we observed in vitro,<sup>57</sup> and that is ubiquitously observed (~7Hz) in the human brain<sup>18</sup>. It is first  
759 important to note that the theta generated by RS neurons described by Carracedo, L et al (2013), arises  
760 from the doublet generated in response to each cycle of delta, and thus why theta (~4Hz) was twice the  
761 frequency of the observed delta (~2Hz). The double peak in  $G(f)$  for human L5 RS neurons implies that RS  
762 neurons are tuned to both 4Hz and 8Hz activity, and not surprisingly the 8Hz peak in  $G(f)$  is similar to the  
763 frequency at which interlaminar coherence was observed in human slices<sup>10</sup>, and is twice the frequency of  
764 the low frequency peak in  $G(f)$ . Our ZD data further supports this relationship between human delta and

765 theta, where the delta peak in  $G(f)$  in this different subset of neurons was  $\sim 5.5$ Hz, and the “theta” peak was  
766 at  $\sim 11$ Hz. That blocking  $I_h$  completely abolished the delta peak, suggests that  $I_h$  tunes L5 RS neurons to track  
767 IB output, which then in turn generate theta (double the frequency of delta) output. Interpreted together  
768 our frequency dependent gain, and ZAP results show that  $I_h$  does not directly contribute to tuning cortical  
769 oscillations at theta ( $\sim 8$ Hz), but rather facilitates the generation of theta by allowing RS neurons to track  
770 delta oscillations (see Figure S8 for schematic of this description).

771 An obvious difference between our previous human slice work <sup>10</sup> and that of Carracedo, L et al  
772 (2013) is that we observed robust deep layer theta (although theta was still more prominent in the  
773 superficial layers). One possible explanation is that the experimental conditions were dramatically different.  
774 Alternatively it has been shown in human cortical tissue, at least in L2/3, that single action potentials  
775 generate long lasting reverberant activity through rebound excitation that lasts an order of magnitude  
776 longer than in the rodent brain <sup>7</sup>. Thus, it is possible that such reverberant activity in L5 results in greater  
777 gain in local L5 cortical circuits that further amplifies theta activity through both synaptic activation, and  
778 the theta peak in  $G(f)$ . This conjecture is further supported by our observation that putative L5 interneurons  
779 demonstrate greater rebound than L2/3 neurons, and thus likely able to amplifying network activity within  
780 L5 potentially beyond what was observed in L2/3 <sup>7</sup>. Future experiments are needed to further explore if  
781 human cortical circuitry is arranged like that of the rodent, specifically as it relates to inter and intralaminar  
782 connectivity.

#### 783 *4.2. Limitations and caveats*

784 It bears acknowledging that there are experimental limitations that might influence our  
785 observation of subthreshold resonance: the increased density of the HCN channel in the dendrites may  
786 result in this resonance being observed better in the dendrites compared to soma <sup>3</sup>, and despite best  
787 practice controls there is the possibility that truncated dendrites might prevent resonance. Truncation of  
788 layer 5 pyramidal cell dendrites is a common and an unavoidable issue due to longer apical dendrite length  
789 in the human neocortex (2mm) <sup>1,3</sup>. However, there is strong evidence for increased dendritic  
790 compartmentalization in large human neurons with distal inputs attenuating strongly towards soma <sup>3</sup>, and  
791 one would expect this effect to mitigate effects of dendritic truncation on subthreshold resonance.

792 An important caveat when interpreting these findings is that these data are exclusively collected  
793 from neurosurgical patients undergoing surgery for drug-resistant epilepsy or for resection of brain tumors.  
794 We note that we have been careful to only perform recordings from unaffected neocortical tissue distal  
795 from the epilepsy focus or tumor site. Nevertheless, it is unclear how these diseases (or their  
796 pharmacological treatment regimes) might contribute to compensatory changes at the level of cortical  
797 neuron physiology. However, by comparing our findings to the previous rich literature in rodents and to  
798 analogous human neuronal datasets collected by other groups, we can be more confident that the results  
799 presented here likely generalize to control human subjects.

#### 800 *4.3. Future implications of this work*

801 This report reflects one of the largest studies of the electrophysiological diversity of human  
802 neocortical pyramidal cells to date. In particular, it contributes to our growing understanding of human L5  
803 pyramidal cells <sup>3</sup> and helps put the unique characteristics of these neurons into context with the better  
804 understood superficial layer pyramidal cells.

805 Moving forward, it will be essential to reconcile these electrophysiological and morphological data  
806 with the emerging consensus of neocortical cell type diversity based on single-cell transcriptomics <sup>3,4,46,58</sup>  
807 and how these features contribute to the unique emergent properties of human cortical circuits.  
808 Furthermore, little is known about the connectivity within human cortical circuits: is human inter- and intra-

809 laminar connectivity similar to rodents, and how do cellular properties contribute to the signatures we  
810 observe in meso- and macroscopic recordings? Answers to these questions will require multi-scale inquires  
811 of human cortical micro-circuits and *in silico* experiments to understand the divergent properties of human  
812 circuits, with the tools for such inquiries only now becoming available.

## 813 Acknowledgements

814 We are immensely grateful to our neurosurgical patients and their families for consenting to the use of  
815 human brain tissue samples for research. We thank Dr. Gelareh Zadeh and Dr. Mark Bernstein for their  
816 assistance in obtaining brain tissue samples and Victoria Barkley and Marjan Rafiee for assistance compiling  
817 demographic and chart information. We thank Sara Mahallati and Xiao Luo for assistance in tissue  
818 preparation. We thank Brian Kalmbach for helpful conversations that informed our analysis of subthreshold  
819 resonance targeting of Layer 3c pyramidal cells. We thank Frances K Skinner, Etay Hay, Wesley Sacher, Xiao  
820 Luo, and Jasmine Bell for their critical comments on the manuscript. We acknowledge generous support  
821 from the CAMH, Krembil, and Kavli Foundations.

## 822 References

- 823 1 Mohan, H. *et al.* Dendritic and axonal architecture of individual pyramidal neurons across layers of  
824 adult human neocortex. *Cerebral Cortex* **25**, 4839-4853 (2015).
- 825 2 Eyal, G. *et al.* Unique membrane properties and enhanced signal processing in human neocortical  
826 neurons. *Elife* **5**, e16553 (2016).
- 827 3 Beaulieu-Laroche, L. *et al.* Enhanced dendritic compartmentalization in human cortical neurons.  
828 *Cell* **175**, 643-651. e614 (2018).
- 829 4 Kalmbach, B. E. *et al.* h-Channels Contribute to Divergent Intrinsic Membrane Properties of  
830 Supragranular Pyramidal Neurons in Human versus Mouse Cerebral Cortex. *Neuron* **100**, 1194-  
831 1208. e1195 (2018).
- 832 5 Boldog, E. *et al.* Transcriptomic and morphophysiological evidence for a specialized human cortical  
833 GABAergic cell type. *Nature neuroscience* **21**, 1185-1195 (2018).
- 834 6 Deitcher, Y. *et al.* Comprehensive morpho-electrotonic analysis shows 2 distinct classes of L2 and  
835 L3 pyramidal neurons in human temporal cortex. *Cerebral Cortex* **27**, 5398-5414 (2017).
- 836 7 Molnár, G. *et al.* Complex events initiated by individual spikes in the human cerebral cortex. *PLoS*  
837 *biology* **6**, e222 (2008).
- 838 8 Silva, L. R., Amitai, Y. & Connors, B. W. Intrinsic oscillations of neocortex generated by layer 5  
839 pyramidal neurons. *Science* **251**, 432 (1991).
- 840 9 Silva, G. T. *et al.* Human synapses show a wide temporal window for spike-timing-dependent  
841 plasticity. *Frontiers in synaptic neuroscience* **2**, 12 (2010).
- 842 10 Florez, C. *et al.* In vitro recordings of human neocortical oscillations. *Cerebral cortex* **25**, 578-597  
843 (2015).
- 844 11 Goriounova, N. A. *et al.* Large and fast human pyramidal neurons associate with intelligence. *Elife*  
845 **7**, e41714 (2018).
- 846 12 Skinner, F. K. Cellular-based modeling of oscillatory dynamics in brain networks. *Current opinion in*  
847 *neurobiology* **22**, 660-669 (2012).
- 848 13 Womelsdorf, T., Ardid, S., Everling, S. & Valiante, T. A. Burst firing synchronizes prefrontal and  
849 anterior cingulate cortex during attentional control. *Current Biology* **24**, 2613-2621 (2014).
- 850 14 Markram, H. *et al.* Reconstruction and simulation of neocortical microcircuitry. *Cell* **163**, 456-492  
851 (2015).
- 852 15 Einevoll, G. T. *et al.* The Scientific Case for Brain Simulations. *Neuron* **102**, 735-744 (2019).

- 853 16 Ruzzo, E. K. & Geschwind, D. H. Schizophrenia genetics complements its mechanistic  
854 understanding. *Nature neuroscience* **19**, 523 (2016).
- 855 17 Vigo, D. V., Kestel, D., Pendakur, K., Thornicroft, G. & Atun, R. Disease burden and government  
856 spending on mental, neurological, and substance use disorders, and self-harm: cross-sectional,  
857 ecological study of health system response in the Americas. *The Lancet Public Health* **4**, e89-e96  
858 (2019).
- 859 18 Groppe, D. M. *et al.* Dominant frequencies of resting human brain activity as measured by the  
860 electrocorticogram. *Neuroimage* **79**, 223-233 (2013).
- 861 19 McGinn, R. J. & Valiante, T. A. Phase–amplitude coupling and interlaminar synchrony are correlated  
862 in human neocortex. *Journal of Neuroscience* **34**, 15923-15930 (2014).
- 863 20 von Nicolai, C. *et al.* Corticostriatal coordination through coherent phase-amplitude coupling.  
864 *Journal of Neuroscience* **34**, 5938-5948 (2014).
- 865 21 Womelsdorf, T., Valiante, T. A., Sahin, N. T., Miller, K. J. & Tiesinga, P. Dynamic circuit motifs  
866 underlying rhythmic gain control, gating and integration. *Nature neuroscience* **17**, 1031 (2014).
- 867 22 Hu, H., Vervaeke, K. & Storm, J. F. Two forms of electrical resonance at theta frequencies, generated  
868 by M-current, h-current and persistent Na<sup>+</sup> current in rat hippocampal pyramidal cells. *The Journal*  
869 *of physiology* **545**, 783-805 (2002).
- 870 23 Das, A. & Narayanan, R. Theta-frequency selectivity in the somatic spike-triggered average of rat  
871 hippocampal pyramidal neurons is dependent on HCN channels. *Journal of neurophysiology* **118**,  
872 2251-2266 (2017).
- 873 24 Neuhoff, H., Neu, A., Liss, B. & Roeper, J. Ih channels contribute to the different functional  
874 properties of identified dopaminergic subpopulations in the midbrain. *Journal of Neuroscience* **22**,  
875 1290-1302 (2002).
- 876 25 Gastrein, P. *et al.* The role of hyperpolarization-activated cationic current in spike-time precision  
877 and intrinsic resonance in cortical neurons in vitro. *The Journal of physiology* **589**, 3753-3773  
878 (2011).
- 879 26 Mansouri, A., Fallah, A. & Valiante, T. A. Determining surgical candidacy in temporal lobe epilepsy.  
880 *Epilepsy research and treatment* **2012** (2012).
- 881 27 Kostopoulos, G., Drapeau, C., Avoli, M., Olivier, A. & Villemeure, J. G. Endogenous adenosine can  
882 reduce epileptiform activity in the human epileptogenic cortex maintained in vitro. *Neuroscience*  
883 *letters* **106**, 119-124 (1989).
- 884 28 Köhling, R. & Avoli, M. Methodological approaches to exploring epileptic disorders in the human  
885 brain in vitro. *Journal of neuroscience methods* **155**, 1-19 (2006).
- 886 29 Ting, J. T., Daigle, T. L., Chen, Q. & Feng, G. in *Patch-Clamp Methods and Protocols* 221-242  
887 (Springer, 2014).
- 888 30 Gouwens, N. W. *et al.* Classification of electrophysiological and morphological neuron types in the  
889 mouse visual cortex. *Nature neuroscience* **22**, 1182-1195 (2019).
- 890 31 Poorthuis, R. B. *et al.* Rapid neuromodulation of layer 1 interneurons in human neocortex. *Cell*  
891 *reports* **23**, 951-958 (2018).
- 892 32 Bar-Yehuda, D. & Korngreen, A. Space-clamp problems when voltage clamping neurons expressing  
893 voltage-gated conductances. *Journal of neurophysiology* **99**, 1127-1136 (2008).
- 894 33 Hutcheon, B., Miura, R. M. & Putil, E. Subthreshold membrane resonance in neocortical neurons.  
895 *Journal of Neurophysiology* **76**, 683-697 (1996).
- 896 34 McInnes, L., Healy, J., Saul, N. & Grossberger, L. UMAP: Uniform Manifold Approximation and  
897 Projection. *Journal of Open Source Software* **3**, 861, doi:10.21105/joss.00861 (2018).
- 898 35 Higgs, M. H. & Spain, W. J. Conditional bursting enhances resonant firing in neocortical layer 2–3  
899 pyramidal neurons. *Journal of Neuroscience* **29**, 1285-1299 (2009).

- 900 36 Galán, R. F., Ermentrout, G. B. & Urban, N. N. Optimal time scale for spike-time reliability: theory,  
901 simulations, and experiments. *Journal of neurophysiology* **99**, 277-283 (2008).
- 902 37 Neske, G. T. & Connors, B. W. Distinct roles of SOM and VIP interneurons during cortical up states.  
903 *Frontiers in neural circuits* **10**, 52 (2016).
- 904 38 Benjamini, Y. & Hochberg, Y. Controlling the false discovery rate: a practical and powerful approach  
905 to multiple testing. *Journal of the royal statistical society. Series B (Methodological)*, 289-300  
906 (1995).
- 907 39 Bates, D., Mächler, M., Bolker, B. & Walker, S. Fitting Linear Mixed-Effects Models Using lme4.  
908 *Journal of Statistical Software* **67**, 48, doi:10.18637/jss.v067.i01 (2015).
- 909 40 Burnham, K. P. & Anderson, D. R. Multimodel inference: understanding AIC and BIC in model  
910 selection. *Sociological methods & research* **33**, 261-304 (2004).
- 911 41 Berg, J. *et al.* Human cortical expansion involves diversification and specialization of supragranular  
912 intratelencephalic-projecting neurons. *BioRxiv* (2020).
- 913 42 Hutcheon, B. & Yarom, Y. Resonance, oscillation and the intrinsic frequency preferences of  
914 neurons. *Trends in neurosciences* **23**, 216-222 (2000).
- 915 43 Zemankovics, R., Káli, S., Paulsen, O., Freund, T. F. & Hájos, N. Differences in subthreshold  
916 resonance of hippocampal pyramidal cells and interneurons: the role of h-current and passive  
917 membrane characteristics. *The Journal of physiology* **588**, 2109-2132 (2010).
- 918 44 Ramaswamy, S. & Markram, H. Anatomy and physiology of the thick-tufted layer 5 pyramidal  
919 neuron. *Frontiers in cellular neuroscience* **9**, 233 (2015).
- 920 45 Baker, A. *et al.* Specialized subpopulations of deep-layer pyramidal neurons in the neocortex:  
921 bridging cellular properties to functional consequences. *Journal of Neuroscience* **38**, 5441-5455  
922 (2018).
- 923 46 Hodge, R. D. *et al.* Conserved cell types with divergent features in human versus mouse cortex.  
924 *Nature* **573**, 61-68 (2019).
- 925 47 Akam, T. & Kullmann, D. M. Oscillations and filtering networks support flexible routing of  
926 information. *Neuron* **67**, 308-320 (2010).
- 927 48 Yu, X. & Lewis, E. R. Studies with spike initiators: linearization by noise allows continuous signal  
928 modulation in neural networks. *IEEE Transactions on Biomedical Engineering* **36**, 36-43 (1989).
- 929 49 Padmanabhan, K. & Urban, N. N. Intrinsic biophysical diversity decorrelates neuronal firing while  
930 increasing information content. *Nature neuroscience* **13**, 1276 (2010).
- 931 50 Ulrich, D. Dendritic resonance in rat neocortical pyramidal cells. *Journal of neurophysiology* **87**,  
932 2753-2759 (2002).
- 933 51 Dembrow, N. C., Chitwood, R. A. & Johnston, D. Projection-specific neuromodulation of medial  
934 prefrontal cortex neurons. *Journal of Neuroscience* **30**, 16922-16937 (2010).
- 935 52 Schmidt, S. L., Dorsett, C. R., Iyengar, A. K. & Fröhlich, F. Interaction of intrinsic and synaptic  
936 currents mediate network resonance driven by layer V pyramidal cells. *Cerebral Cortex* **27**, 4396-  
937 4410 (2016).
- 938 53 Lampl, I. & Yarom, Y. Subthreshold oscillations and resonant behavior: two manifestations of the  
939 same mechanism. *Neuroscience* **78**, 325-341 (1997).
- 940 54 Carracedo, L. M. *et al.* A neocortical delta rhythm facilitates reciprocal interlaminar interactions via  
941 nested theta rhythms. *Journal of Neuroscience* **33**, 10750-10761 (2013).
- 942 55 Chagnac-Amitai, Y., Luhmann, H. J. & Prince, D. A. Burst generating and regular spiking layer 5  
943 pyramidal neurons of rat neocortex have different morphological features. *Journal of Comparative*  
944 *Neurology* **296**, 598-613 (1990).
- 945 56 Perin, R., Berger, T. K. & Markram, H. A synaptic organizing principle for cortical neuronal groups.  
946 *Proceedings of the National Academy of Sciences* **108**, 5419-5424 (2011).

947 57 Florez, C. *et al.* In vitro recordings of human neocortical oscillations. *Cerebral Cortex* **25**, 578-597  
948 (2013).  
949 58 Habib, N. *et al.* Massively parallel single-nucleus RNA-seq with DroNc-seq. *Nature methods* **14**, 955  
950 (2017).

951

952

953

954

955

956

957

958

959

960

961

962

963

964

965

966

967

968

969

970

971

972

973

974

975

976

977

978

979 Supplemental Figures and Legends

980

981

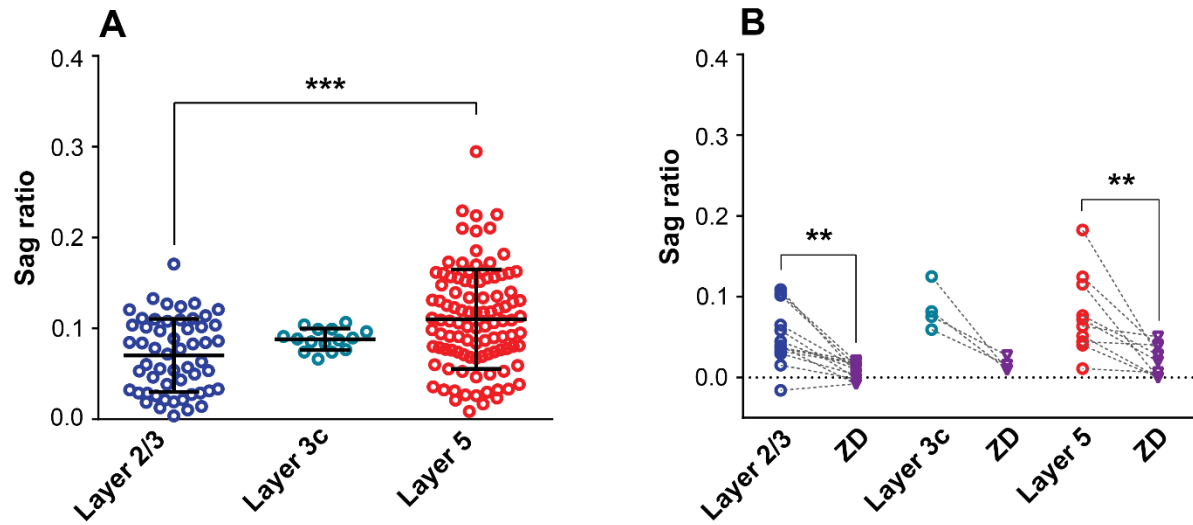

982

983 **Figure S1: Sag differences between cortical layers are robust to normalizing for input resistance differences**  
984 **using the dimensionless sag ratio measure. (A)** Same as Fig 2B, but data are plotted using the sag ratio  
985 measure. **(B)** Same as Fig 2E, showing bath application of  $I_h$  blocker ZD7288 (10  $\mu$ M) reducing sag ratio in  
986 pyramidal cells from both layers.

987

988



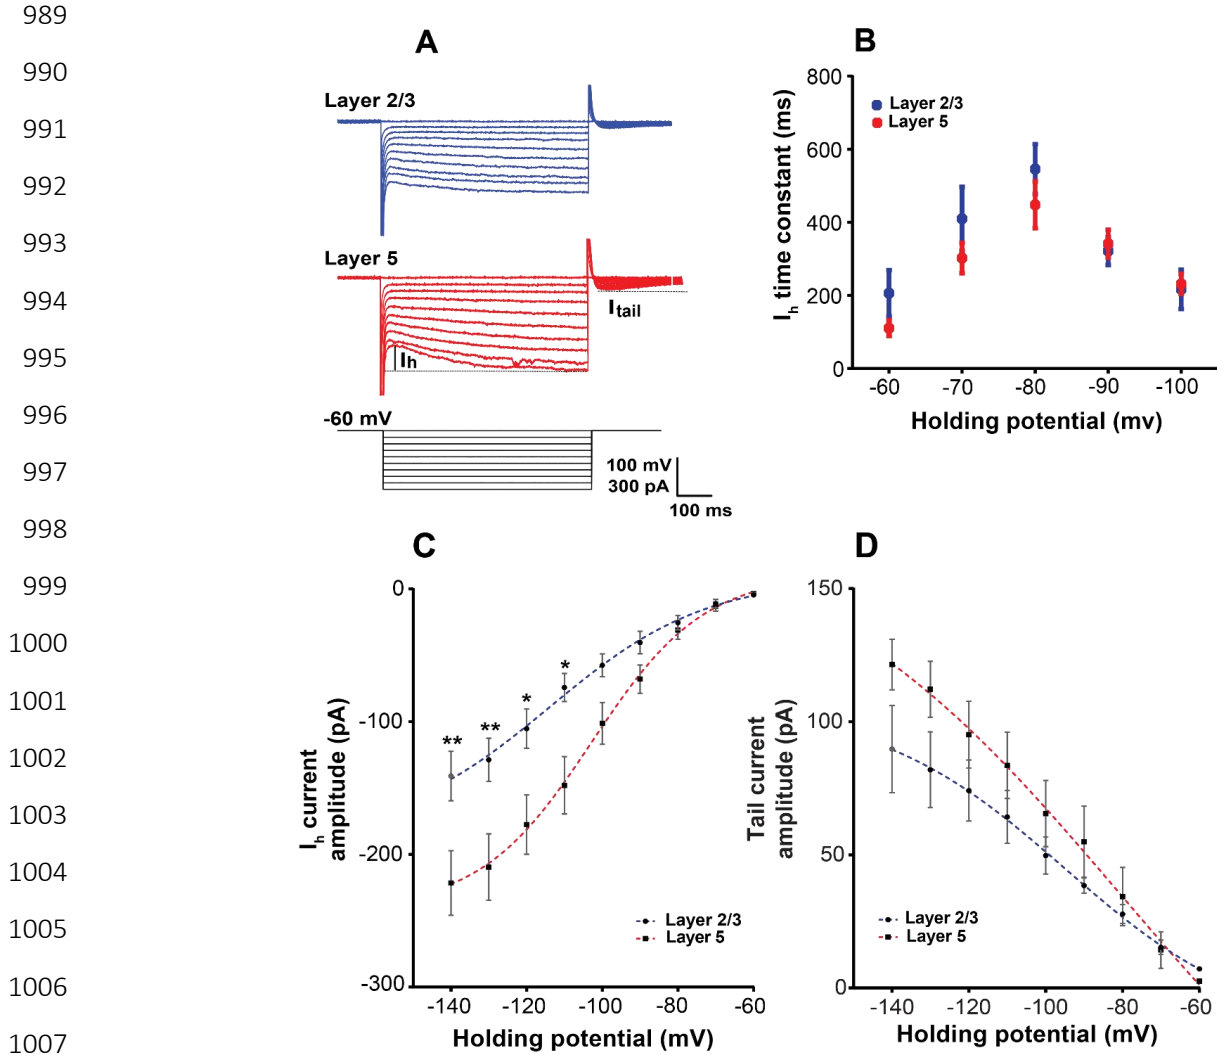

1008 **Figure S2: The kinetics of  $I_h$  are similar between L2/3 and L5 pyramidal cells.** (A) Example voltage-clamp recordings of L2/3 and L5 pyramidal cells. Annotations show calculation of  $I_h$  and  $I_{tail}$ . (B) Voltage clamp recordings of current show that  $I_h$  time constants are similar between L2/3 and L5 pyramidal cells. (C) L5 pyramidal cells had significantly larger amplitude  $I_h$  compared to L2/3 pyramidal cells. (D) Quantification of  $I_{tail}$  at the end of each holding potential revealed that there was no significant difference between L2/3 and L5. The dashed lines in C and D indicates the fit to a Boltzmann function. These data suggest that the difference between sag voltages in L2/3 and L5 pyramidal cells are not due to differences in the kinetics of HCN channels.

1016

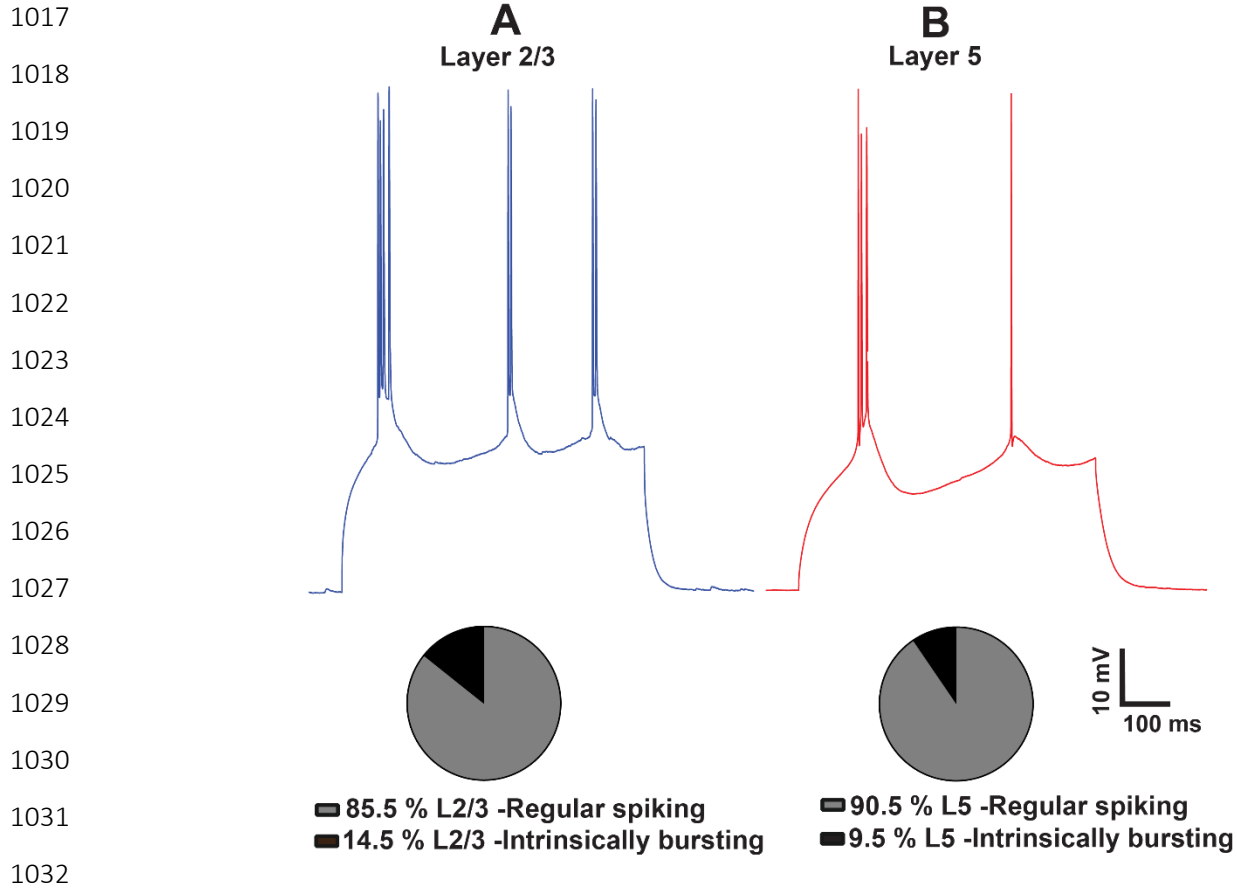

1033 **Figure S3: Distribution of different firing patterns across L2/3 and L5 pyramidal cells. (A,B)** Example  
1034 voltage traces of intrinsically bursting neurons at rehobase. L2/3 (A) and L5 (B) pyramidal cells tend to have  
1035 more regular spiking than intrinsically bursting neurons. The percentage of intrinsically bursting neurons  
1036 recorded in L2/3 was slightly higher than L5.

1037

1038

1039  
1040  
1041  
1042  
1043  
1044  
1045  
1046  
1047  
1048  
1049  
1050  
1051  
1052  
1053  
1054  
1055  
1056  
1057  
1058  
1059  
1060  
1061  
1062  
1063  
1064  
1065  
1066  
1067  
1068

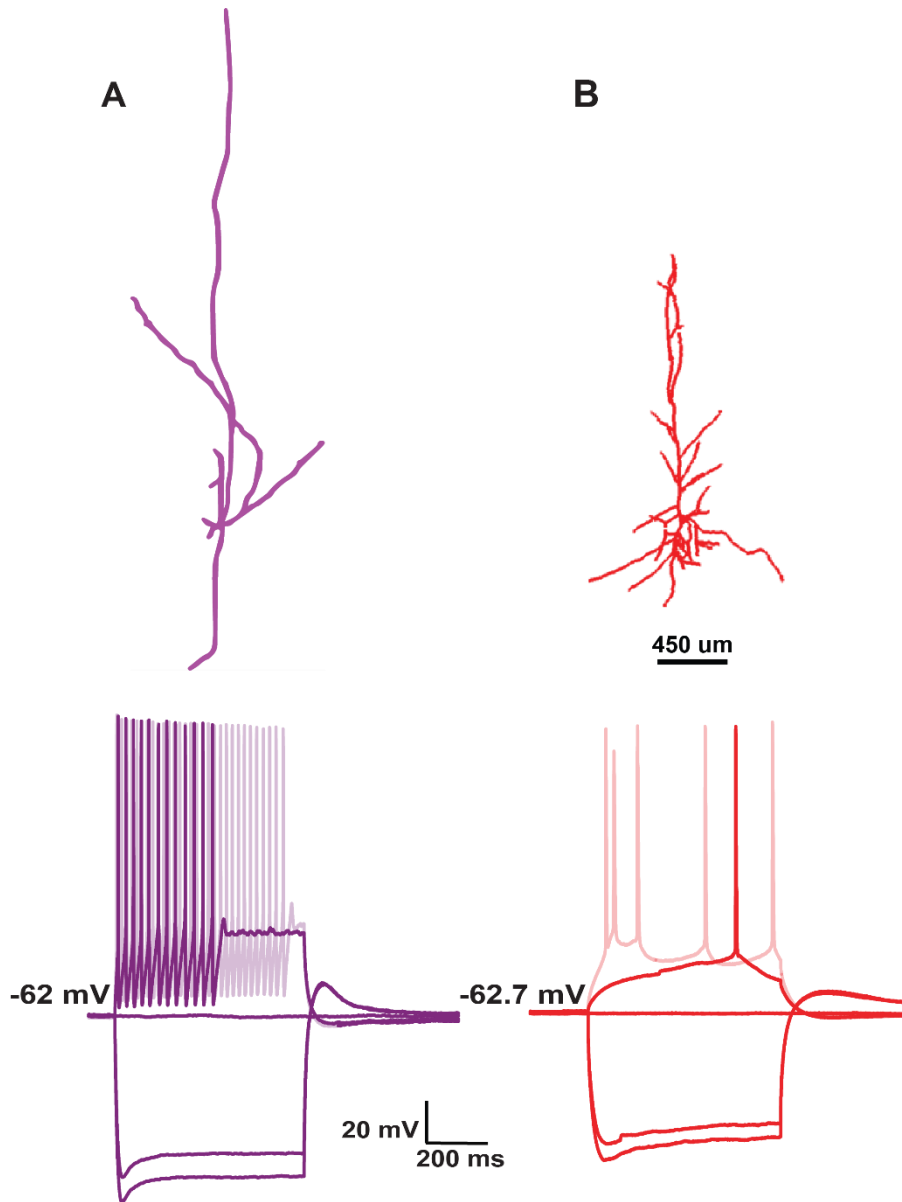

**Figure S4: Morphological evidence for interneuron sampling.** (A) Morphological reconstruction and firing pattern following hyperpolarizing and depolarizing current injections for a putative interneuron. (B) Morphological reconstruction from a confirmed pyramidal cell (cell f in Figure 1) and related firing pattern following hyperpolarizing and depolarizing current injections.

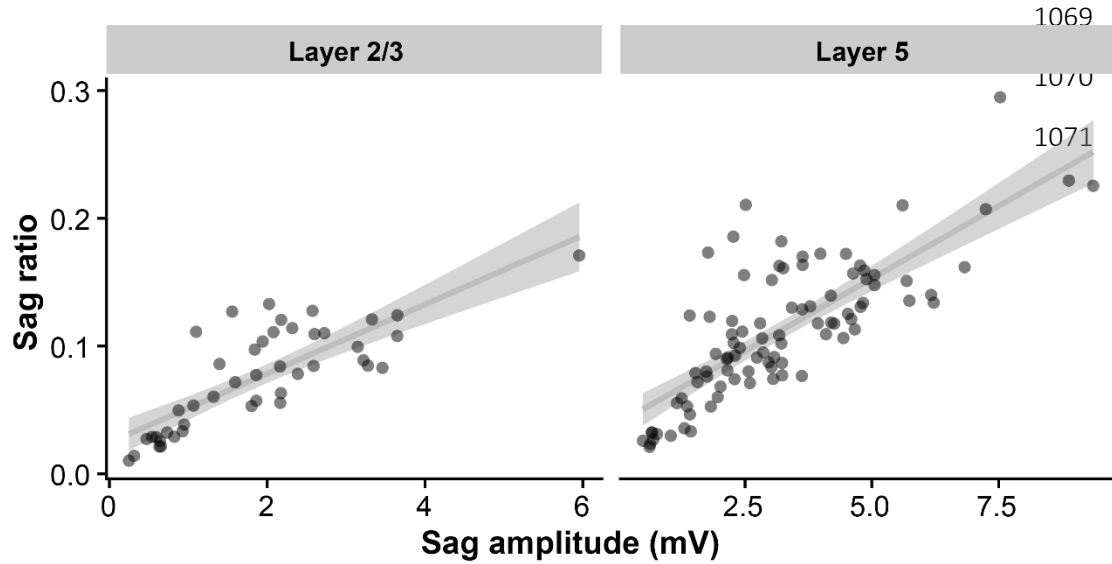

1072

1073 Figure S5: Correlation between sag voltage and sag ratio in data from the Krembil Institute cohort.

1074

1075

1076

1077

1078

1079

1080

1081

1082

1083

1084

1085

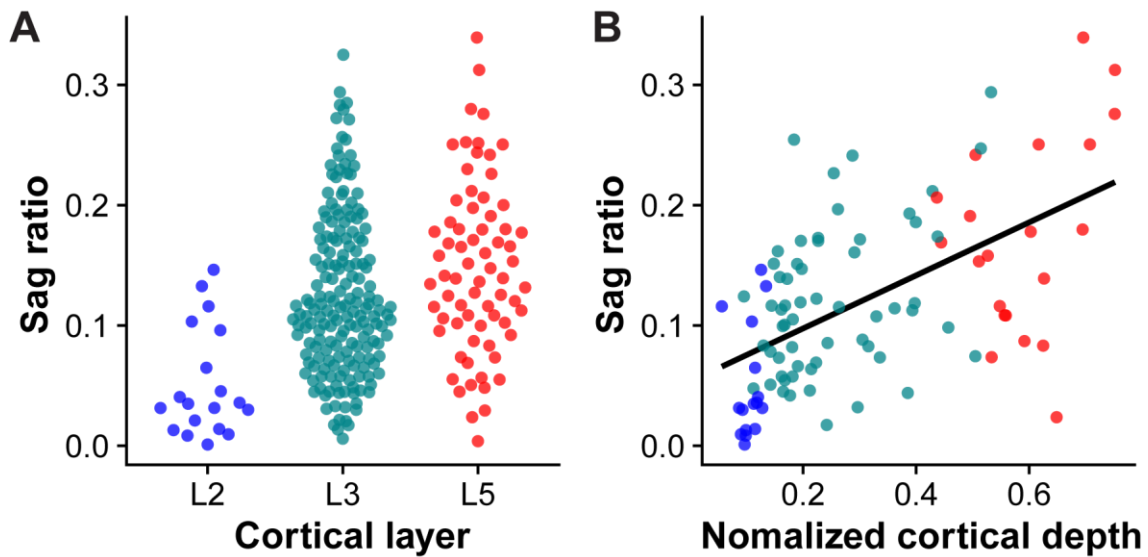

1086 Figure S6: Sag ratio measurements in human cortical pyramidal cells collected from the Allen Institute. (A)

1087 Sag ratio measurements collected in each cortical layer. (B) Sag ratio as a function of normalized cortical

1088 depth from the pial surface. Cells are a subset of those shown in (A) with normalized cortical depth

1089 information available. Line indicates best fit line.

1090  
1091  
1092  
1093  
1094  
1095  
1096  
1097  
1098  
1099  
1100  
1101  
1102  
1103  
1104  
1105  
1106  
1107  
1108  
1109  
1110  
1111  
1112  
1113  
1114  
1115  
1116  
1117  
1118  
1119  
1120  
1121  
1122  
1123  
1124  
1125  
1126  
1127  
1128  
1129  
1130  
1131  
1132

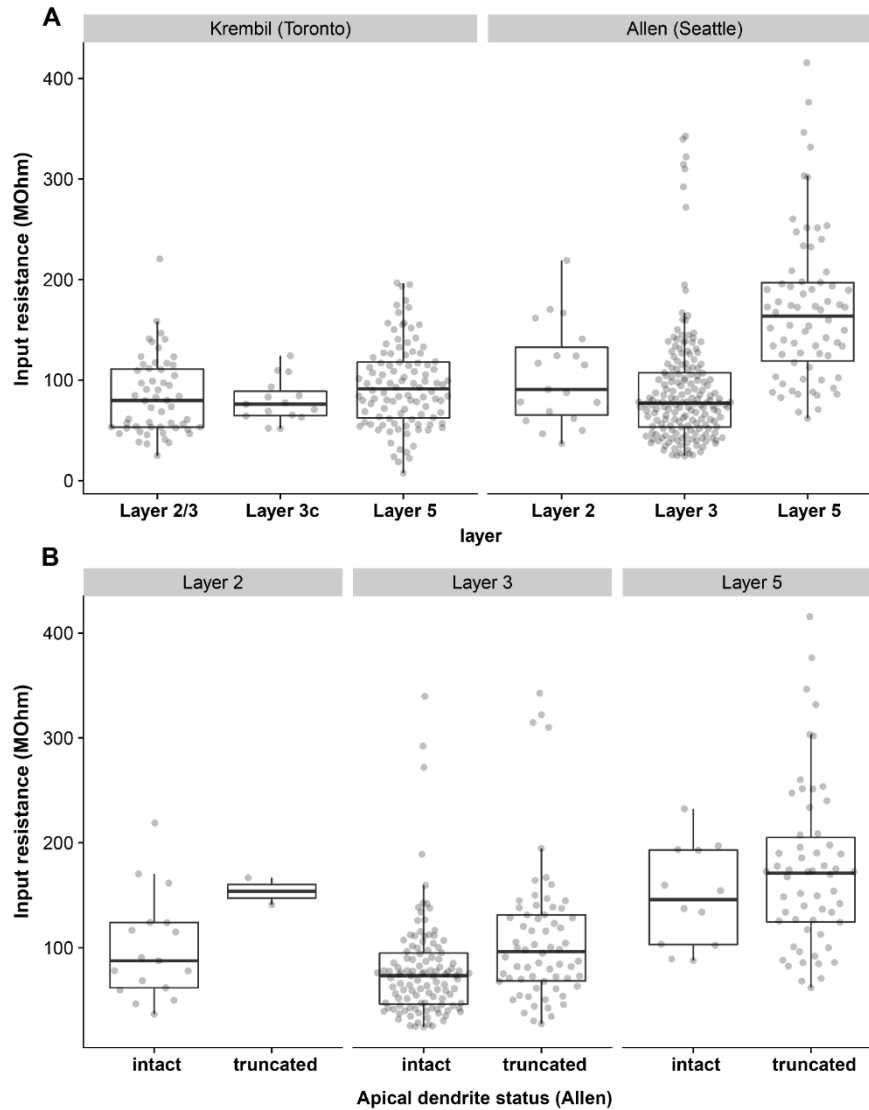

**Figure S7: Comparison of input resistance measurements in human cortical pyramidal cells collected from the Krembil Institute and the Allen Institute. (A)** Input resistance measurements from Krembil Institute cohort (left) and Allen Institute cohort (right). Note trend for increase in input resistances from L5 pyramidal cells relative to L2/3 neurons. **(B)** Same as right panel of A, but data have been grouped by whether the apical dendrite is intact or truncated. According to Allen Institute’s documentation, an apical dendrite is “intact” if the entire length of the primary dendrite was contained within the thickness of the slice and “truncated” if the primary dendritic branch was cut off at either slice surface. While dendrite truncation tends to increase input resistances, the overall relationship that input resistances in L2/3 are smaller than in L5 holds for neurons with confirmed intact primary dendrites.

1133  
1134  
1135  
1136  
1137  
1138  
1139  
1140  
1141  
1142  
1143  
1144  
1145  
1146  
1147  
1148  
1149  
1150  
1151  
1152  
1153  
1154  
1155  
1156  
1157  
1158  
1159  
1160  
1161  
1162  
1163

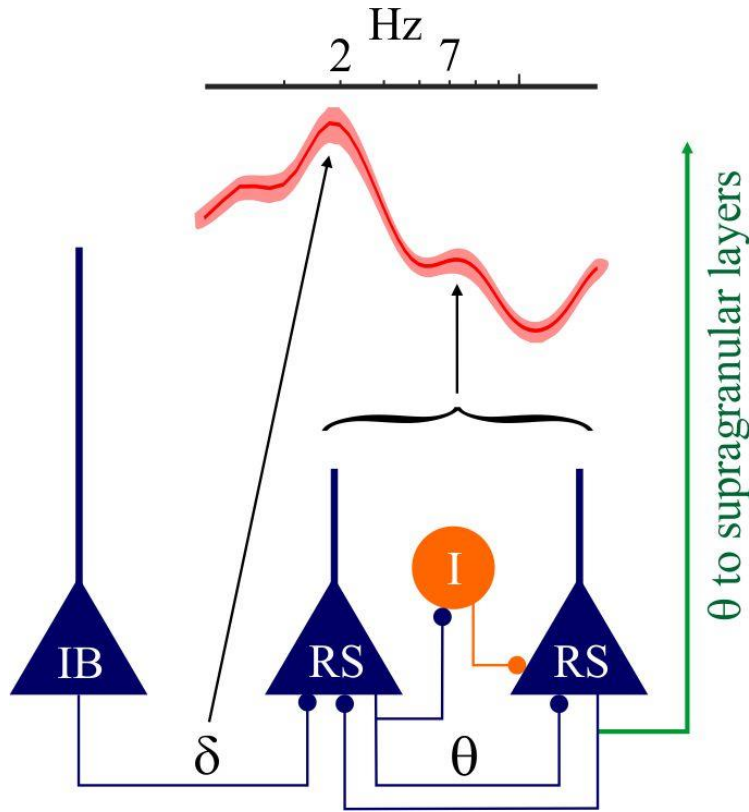

**Figure S8: Structural circuit motif for L5 theta oscillations.** Delta frequency output from intrinsically bursting (IB)<sup>54</sup> neurons is well tracked by regular spiking (RS) neurons that have a peak in  $G(f)$  (red) (see Figure 7B in main text) within the delta frequency range. In turn RS neurons that are poorly adapting, have steep f-I curves, and low rheobase discharge at theta frequency<sup>54</sup>. RS cell drive local circuits at theta frequency range including other RS neurons that track theta well via the peak at 7Hz in  $G(f)$ . Interneurons amplify local activity through rebound excitation (I; orange; see Figure 5 main text) in human circuits that are predisposed to reverberant activity<sup>7</sup>.
